1 **Title:** Fatal neuroinvasion and SARS-CoV-2 tropism in K18-hACE2 mice is partially  
2 independent on hACE2 expression

3

4 **Running Title:** Spatiotemporal analysis of SARS-CoV-2 in K18-hACE2

5 Mariano Carossino<sup>6</sup>, Paige Montanaro<sup>1-2\*</sup>, Aoife O'Connell<sup>1,3\*</sup>, Devin Kenney<sup>1,3\*</sup>, Hans  
6 Gertje<sup>1</sup>, Kyle A. Grosz <sup>1</sup>, Maria Ericsson<sup>7</sup>, Bertrand R Huber<sup>8</sup>, Susanna A. Kurnick<sup>1</sup>,  
7 Saravanan Subramaniam<sup>4</sup>, Thomas A. Kirkland<sup>9</sup>, Joel R. Walker<sup>9</sup>, Kevin P. Francis<sup>10</sup>,  
8 Alexander D. Klose<sup>11</sup>, Neal Paragas<sup>11,12</sup>, Markus Bosmann<sup>1,4,13</sup>, Mohsan Saeed<sup>1,5</sup>, Udeni  
9 B. R. Balasuriya<sup>6</sup>, Florian Douam<sup>1,3\$#</sup>, and Nicholas A. Crossland<sup>1,2\$#</sup>

10 <sup>1</sup>National Emerging Infectious Diseases Laboratories (NEIDL), Boston University, Boston,  
11 MA, USA

12 <sup>2</sup>Department of Pathology and Laboratory Medicine, Boston University School of  
13 Medicine, Boston, MA, USA

14 <sup>3</sup>Department of Microbiology, Boston University School of Medicine, Boston, MA, USA

15 <sup>4</sup>Department of Medicine, Pulmonary Center, Boston University School of Medicine,  
16 Boston, MA, USA

17 <sup>5</sup>Department of Biochemistry, Boston University, Boston, MA 02118, USA

18 <sup>6</sup>Louisiana Animal Disease Diagnostic Laboratory (LADDDL) and Department of  
19 Pathobiological Sciences, School of Veterinary Medicine, Louisiana State University,  
20 Baton Rouge, LA, USA

21 <sup>7</sup>Electron Microscopy Core Facility, Harvard Medical School, Boston, MA, USA

22 <sup>8</sup>Department of Neurology, Boston University School of Medicine, Boston, MA, USA

23 <sup>9</sup>Promega Biosciences, LLC, San Luis Obispo, CA, USA

24 <sup>10</sup>Perkin Elmer, Hopkinton, MA, USA

25 <sup>11</sup>InVivo Analytics Inc, New York, NY, USA

26 <sup>12</sup>Department of Radiology Imaging Research Lab, University of Washington, Seattle,  
27 WA, USA

28 <sup>13</sup>Center for Thrombosis and Hemostasis, University Medical Center of the Johannes  
29 Gutenberg-University, Mainz, Germany

30 \*, \$ These authors contributed equally to the work.

31 # Co-corresponding author's contact information: Florian Douam, PhD, [fdouam@bu.edu](mailto:fdouam@bu.edu),

32 (617)-358-9174; Nicholas Crossland, DVM, [ncrossla@bu.edu](mailto:ncrossla@bu.edu), (617)-358-9285.

33

34 **Keywords:** Translational animal model, comparative pathology, immunohistochemistry,  
35 *in situ* hybridization, viral pathogenesis, transmission electron microscopy, in vivo imaging

36 **Abstract word count:** 249

37 **Word count of text:** 10,202 (excluding references, table footnotes, and figure legends)

38

## 39 **ABSTRACT**

40 Animal models recapitulating distinctive features of severe COVID-19 are critical to  
41 enhance our understanding of SARS-CoV-2 pathogenesis. Transgenic mice expressing  
42 human angiotensin-converting enzyme 2 (hACE2) under the cytokeratin 18 promoter  
43 (K18-hACE2) represent a lethal model of SARS-CoV-2 infection. The precise  
44 mechanisms of lethality in this mouse model remain unclear. Here, we evaluated the  
45 spatiotemporal dynamics of SARS-CoV-2 infection for up to 14 days post-infection.  
46 Despite infection and moderate pneumonia, rapid clinical decline or death of mice was  
47 invariably associated with viral neuroinvasion and direct neuronal injury (including brain  
48 and spinal neurons). Neuroinvasion was observed as early as 4 dpi, with virus initially  
49 restricted to the olfactory bulb supporting axonal transport via the olfactory  
50 neuroepithelium as the earliest portal of entry. No evidence of viremia was detected  
51 suggesting neuroinvasion occurs independently of entry across the blood brain barrier.  
52 SARS-CoV-2 tropism was not restricted to ACE2-expressing cells (e.g., AT1  
53 pneumocytes), and some ACE2-positive lineages were not associated with the presence  
54 of viral antigen (e.g., bronchiolar epithelium and brain capillaries). Detectable ACE2  
55 expression was not observed in neurons, supporting overexpression of ACE2 in the nasal  
56 passages and neuroepithelium as more likely determinants of neuroinvasion in the K18-  
57 hACE2 model. Although our work incites caution in the utility of the K18-hACE2 model to  
58 study global aspects of SARS-CoV-2 pathogenesis, it underscores this model as a unique  
59 platform for exploring the mechanisms of SARS-CoV-2 neuropathogenesis that may have

60 clinical relevance acknowledging the growing body of evidence that suggests COVID-19

61 may result in long-standing neurologic consequences.

62

63 **IMPORTANCE**

64 COVID-19 is predominantly a respiratory disease caused by SARS-CoV-2 that has  
65 infected more than 191 million people with over 4 million fatalities (2021-07-20). The  
66 development of animal models recapitulating distinctive features of severe COVID-19 is  
67 critical to enhancing our understanding of SARS-CoV-2 pathogenesis and in the  
68 evaluation of vaccine and therapeutic efficacy. Transgenic mice expressing human  
69 angiotensin-converting enzyme 2 (hACE2) under the cytokeratin 18 promoter (K18-  
70 hACE2) represent a lethal model of SARS-CoV-2 infection. Here, we show lethality of this  
71 model is invariably associated with viral neuroinvasion linked with viral replication and  
72 assembly. Importantly, pneumonia albeit invariably present was generally moderate with  
73 the absence of culturable infectious virus at peak neuroinvasion. The dynamics of viral  
74 neuroinvasion and pneumonia were only partially dependent on hACE2. Overall, this  
75 study provides an in-depth sequential characterization of the K18-hACE2 model following  
76 SARS-CoV-2 infection, highlighting its significance to further study the mechanisms of  
77 SARS-CoV-2 neuropathogenesis.

78

## 79 INTRODUCTION

80 The world is experiencing the devastating effects of the Coronavirus Disease 2019  
81 (COVID-19) pandemic, a highly contagious viral respiratory disease caused by the newly  
82 emerged betacoronavirus, Severe Acute Respiratory Syndrome Coronavirus-2 (SARS-  
83 CoV-2) (1-3). The initial index case was reported at a seafood market in Wuhan, Hubei  
84 Province, China in late 2019 (1). While still under investigation, it has been postulated  
85 that the progenitor of SARS-CoV-2 may have originated from horseshoe bats  
86 (*Rhinolophus affinis*) or Malayan pangolins (*Manis javanica*) that, following spill over into  
87 humans, acquired the genomic features leading to adaptation and human-to-human  
88 transmission (1). SARS-CoV-2 has a high transmissibility rate, and, to date, it has  
89 infected nearly 194 million people, resulting in over 4 million fatalities (2021-07-28) (4).  
90 COVID-19 causes respiratory disease of variable severity, ranging from mild to severe,  
91 with the development of acute respiratory distress syndrome requiring intensive care and  
92 mechanical ventilation (3, 5-7). Numerous comorbidities including hypertension, obesity,  
93 and diabetes, among others, are affiliated with an increased risk of developing severe  
94 COVID-19 (5, 6, 8-10). Furthermore, a proportion of infected patients go on to develop  
95 poorly understood neurological signs and/or symptoms mostly associated with the loss of  
96 smell and taste (anosmia and ageusia), headache, dizziness, encephalopathy (delirium),  
97 and ischemic injury (stroke), in addition to a range of less common symptoms (5, 7, 11-  
98 17). Multiple studies have identified either SARS-CoV-2 RNA and/or protein in the brain  
99 of COVID-19 patients with the olfactory neuroepithelium postulated as a portal of entry  
100 (18, 19). COVID-19 has severely challenged health care systems around the globe, with  
101 the urgent need for medical countermeasures including the development of efficacious  
102 vaccines and therapeutics.

103 Animal models permissive to SARS-CoV-2 that could serve as suitable models to help  
104 better understand the pathogenesis of COVID-19, while simultaneously assisting in the  
105 development and evaluation of novel vaccines and therapeutics to combat this disease,  
106 are critically needed (20-22). While various animal models (mice, hamsters, non-human  
107 primates, ferrets, minks, dogs, and cats) have been evaluated to date (22-30), none  
108 faithfully recapitulates all the pathological features of COVID-19. The main limitation in  
109 the development of suitable murine models of COVID-19 is related to the virus entry  
110 mechanism: SARS-CoV-2 binds to target cells via interaction between the viral spike  
111 protein (S) and the host angiotensin-converting enzyme 2 (ACE2), considered to be the  
112 major host entry receptor (31). The low binding affinity between the S protein and murine  
113 ACE2 (mACE2) renders conventional mouse strains naturally resistant to infection,  
114 posing a challenge in the development of murine models of COVID-19 (31-34). These  
115 difficulties have been circumvented by the development of transgenic murine models that  
116 express human ACE2 (hACE2) under different promoters including hepatocyte nuclear  
117 factor-3/forkhead homologue 4 (HFH4), and cytokeratin 18 (K18) (30, 35-38). The  
118 transgenic murine model expressing hACE2 under a K18 promoter (namely K18-hACE2)  
119 was developed by McCray et al in 2007 to study SARS-CoV-1 (36), which shares the  
120 same host receptor as SARS-CoV-2 (39).

121 SARS-CoV-2 infection of K18-hACE2 mice results in up to 100% lethality, analogous to  
122 that reported for SARS-CoV (30, 36, 38). Early reports communicated lethality to be  
123 associated primarily with severe lung inflammation and impaired respiratory function,  
124 suggesting that this model can recapitulate features of the respiratory disease observed  
125 in severe cases of COVID-19 (30, 38). However, the confounding impact of neuroinvasion

126 and its role in the clinical decline of SARS-CoV-2 infected K18-hACE2 mice is becoming  
127 more readily acknowledged (19, 40, 41).

128 Under K18 regulation, the expression of hACE2 is reported to be limited mainly to airway  
129 epithelial cells and enterocytes lining the colonic mucosa, to a lower degree within kidney,  
130 liver, spleen, and small intestine, and to a relatively minor level of expression in the brain  
131 (36). However, the cellular distribution of ACE2, and particularly hACE2, in tissues of K18-  
132 hACE2 mice remains largely undetermined. We hypothesized that the nature, severity,  
133 and outcome of disease in K18-hACE2 mouse model is not solely dictated by the  
134 expression and tissue distribution of hACE2 and that increased lethality in this model is  
135 ultimately related to neuroinvasion, in part driven by regional ACE2 overexpression in the  
136 nasal passages promoting retrograde axonal transport through the olfactory nerve. To  
137 investigate this hypothesis, we undertook a comprehensive spatiotemporal analysis of  
138 histologic and ultrastructural changes, cellular distribution of viral protein and RNA, viral  
139 loads, and antibody titers, along with a detailed analysis of the distribution of *hACE2*  
140 mRNA, ACE2 protein, and its correlation with SARS-CoV-2 tropism as it pertains to this  
141 model.

142 Although SARS-CoV-2 protein and RNA were detected in ACE2-expressing cells such as  
143 olfactory neuroepithelium (ONE) and alveolar type 2 (AT2) cells, we found that SARS-  
144 CoV-2 primarily infected neurons and alveolar type 1 (AT1) pneumocytes, which lacked  
145 detectable ACE2 protein. Our results support neuroinvasion as the primary cause of  
146 mortality in the K18-hACE2 mouse model. This claim was supported by the observation  
147 that viral load and titers peaked in the brain when animals began to meet euthanasia  
148 criteria or succumb to disease. This was clinically reflected by onset of profound



149 hypothermia and onset of neurological signs including tremors. Neurons in terminal  
150 animals display prominent spongiotic degeneration and necrosis with concurrent  
151 detection of abundant viral protein, RNA, and virus particle assembly. Although  
152 pneumonia was uniformly observed and peaks at 7 dpi, it was of moderate severity with  
153 declining viral loads compared to that of the brain. We found that several histologic  
154 hallmarks of severe COVID-19 were lacking in this model, (i.e., lack of diffuse alveolar  
155 damage and microthrombi), suggesting pneumonia plays a contributing role rather than  
156 the primary determinant of lethality in this model. Interestingly, the absence of detectable  
157 ACE2 expression in neurons suggested that viral neuroinvasion is a mechanism partially  
158 independent of ACE2.

159 Altogether, this study expands the current knowledge on the K18-hACE2 murine model  
160 to study severe COVID-19. Our findings will help refine utilization of this model for  
161 providing a relevant understanding of the molecular mechanisms driving  
162 neuropathogenesis and pulmonary pathology.

163

## 164 **RESULTS**

165 **SARS-CoV-2 is invariably fatal in infected K18-hACE2 mice with evidence of**  
166 **neuroinvasion.**

167 K18-hACE2 mice inoculated intranasally with SARS-CoV-2 ( $1 \times 10^6$  plaque-forming units  
168 [PFU]; n=35 [n=19 male and n=16 female) began losing weight as early as 4 days post-  
169 infection (dpi) irrespective of sex, with maximum weight loss occurring at 6-7 dpi (18.4%  
170  $\square$  6.8% in male mice, 21.4%  $\square$  1.8% in female, and combined 19.7%  $\square$  5.2%; Fig. 1A).  
171 Trends in weight loss paralleled increasing clinical scores and declines in core body

172 temperature, with the latter two precipitously increasing or decreasing respectively near  
173 the time of death (Fig. 1B, C). SARS-CoV-2-infected K18-hACE2 mice exhibited  
174 neurological signs starting 6 dpi, characterized by profound stupor, tremors,  
175 proprioceptive defects, and abnormal gait, with most animals euthanized or found dead  
176 in their cage at 6 and 7 dpi (~94%; 33/35 [Fig. 1D]). At the time of death (6-7 dpi), the  
177 median clinical score was 3 (interquartile range = 1) and the mean body temperature was  
178  $30.9 \pm 3.0$  °C. Two male mice survived to the end of the 14-day observation period and  
179 did not display hypothermia during the course of the observation period, a feature that  
180 was consistently observed in animals that succumbed to disease or met euthanasia  
181 criteria.

182 Peak of lethality was associated with significant increases in viral loads (viral RNA and  
183 infectious virus particles) in the brain of the K18-hACE2 mice (Fig. 1E,F), as previously  
184 reported (19, 38, 41). In the lung, viral RNA copies were detectable at the earliest  
185 experimental timepoint (2 dpi) and remained stable over time, consistently within the  
186 value range reported in previous studies (30). While viral RNA remained high, viral titers  
187 however gradually declined over time, with no infectious virus recovered by 7 dpi (Fig.  
188 1E-F). Although the absence of recoverable infectious virus in the lungs at 7 dpi was  
189 unexpected, this sharp decline mirrors published work that illustrated a 100-fold decline  
190 in PFUs at 7 dpi compared to 4 dpi (30). In contrast, viral RNA and infectious particles in  
191 the brain were low to undetectable at 4 dpi, but dramatically increased at 7 dpi (Fig 1E-F)  
192 representing the highest mean viral RNA load and infectious virus particles during the  
193 study. A small amount of viral RNA was detected in the serum (Fig.1G); however,  
194 incubation of SARS-CoV-2 permissive cell lines with serum samples did not result in any

195 detectable productive infection *in vitro*, confirming an absence of viremia in intranasally-  
196 inoculated K18-hACE2 mice (Fig. 1H). Altogether, our data illustrate that lethality was  
197 associated with increasing viral RNA loads and infectious virus particles in the brain,  
198 which were simultaneously declining in the lung.

199

200 **SARS-CoV-2 results in transient mild infection in the nasal cavity of K18-hACE2**  
201 **mice.**

202 We next performed detailed histologic analysis of various tissues to uncover the  
203 morphologic correlates of lethality in K18-hACE2 mice. For this, we first focused on the  
204 spatial and temporal dynamics of SARS-CoV-2 infection in the upper respiratory tract and  
205 analyzed the anterior/rostral nasal cavity (Fig. 2A-F) and olfactory neuroepithelium (Fig.  
206 2G-L) for disease-associated lesions. To do so, we performed a thorough sequential  
207 histologic analysis combined with immunohistochemistry (IHC) and RNAscope® *in situ*  
208 hybridization (42) to determine the cellular localization and abundance of SARS-CoV-2  
209 protein and RNA, using an anti-spike monoclonal antibody and an S-specific RNA probe,  
210 respectively.

211 At 2 dpi, the anterior/rostral nasal cavity was characterized by mild, multifocal neutrophilic  
212 inflammation (rhinitis) with segmental degeneration and necrosis of transitional and  
213 respiratory epithelium (Fig. 2B), which colocalized with intracytoplasmic SARS-CoV-2  
214 protein and RNA (Fig. 2E). Adjacent nasal passages were partially filled with small  
215 amounts of cellular debris, degenerate neutrophils, and small numbers of erythrocytes.  
216 The lamina propria underlying affected areas was infiltrated by low to mild numbers of  
217 neutrophils and fewer lymphocytes (Fig. 2B). At 4 dpi, epithelial degeneration and

218 necrosis in the rostral and intermediate turbinates was no longer observed, replaced by  
219 mild residual lymphocytic rhinitis and rare neutrophils within the lamina propria (Fig. 2C),  
220 and absence of exudate within nasal passages. SARS-CoV-2 protein and RNA were less  
221 commonly observed and restricted to rare positive cells in the respiratory epithelium (Fig.  
222 2F and Table 1 and Table S1). By 7 dpi, the anterior/rostral nasal cavity was histologically  
223 within normal limits and no SARS-CoV-2 protein or RNA were detectable (Fig. 2C, F and  
224 Table 1 and Table S1).

225 The posterior nasal cavity, olfactory neuroepithelium (ONE) (Fig.2G-L), displayed mild  
226 segmental degeneration and necrosis at 2 dpi, which colocalized with abundant SARS-  
227 CoV-2 protein and RNA (Fig. 2K and Table 1 and Table S1). By 4 dpi, histopathologic  
228 lesions in the ONE had resolved, but rare SARS-CoV-2 protein and RNA were observed  
229 both at 4 and 7 dpi (Fig. 2L and Table 1). No SARS-CoV-2 protein or RNA were detected  
230 in the ONE by 14 dpi (Table 1 and Table S1).

231

### 232 **SARS-CoV-2 induces moderate interstitial pneumonia in K18-hACE2 mice.**

233 In the lower respiratory tract, histologic alterations in the pulmonary parenchyma mainly  
234 involved the alveoli, interstitium and perivascular compartment (Fig. 3A-K). Overall,  
235 pathologic alterations in the lungs were characterized by moderate progressive  
236 lymphohistiocytic and neutrophilic interstitial pneumonia that peaked at 7 dpi (Fig. 3G, H).  
237 We quantitatively analyzed the total % of pneumonia using a machine learning classifier  
238 to differentiate normal vs. pneumonic lung tissue. Peak disease was confirmed to occur  
239 at 7 dpi, with a mean of ~10% of total lung area affected, with one outlier of ~40% of total  
240 lung area, suggesting that more severe disease is possible, albeit uncommon (Fig. 3K).

241 Of note, data from our 2 dpi animals were excluded from tissue classification analysis as  
242 lungs were sub-optimally insufflated and the classifier algorithm falsely labeled areas of  
243 atelectasis as pneumonia. Pneumonia was interpreted to be minimal at this timepoint and,  
244 thus, considered negligible.

245 At 2 dpi, minimal perivascular and peribronchiolar inflammation, consisting primarily of  
246 lymphocytes and histiocytes, and occasional perivascular edema were observed (Fig.  
247 3C). Pulmonary vessels were frequently reactive and lined by a plump endothelium with  
248 marginating leukocytes (Fig. 3D). SARS-CoV-2 protein and RNA (Fig. 4A-J) were  
249 observed in proximity to areas of interstitial pneumonia and localized within the cytoplasm  
250 of alveolar type (AT) 1 (squamous epithelium) and fewer AT2 cells (cuboidal epithelium)  
251 (Fig. 4B, G).

252 At 4 dpi, peak in viral protein and RNA abundance were observed (correlating with the  
253 highest viral titer and RNA load as determined by RT-qPCR and plaque assays) (Fig 4C,  
254 H) along with increasing lymphohistiocytic and neutrophilic infiltrate (Figs. 3E, F). SARS-  
255 CoV-2 cellular tropism did not differ from that described at 2 dpi, but SARS-CoV-2 protein  
256 and RNA were more abundant and routinely observed in histologically normal  
257 pneumocytes (Fig 4C, H).

258 At 7 dpi, lymphohistiocytic and neutrophilic interstitial pneumonia peaked in severity,  
259 which on average was moderate to regionally severe, affecting ~10-40% of the  
260 parenchyma (Fig. 3G, H, K). Additional unique findings at 7dpi included, rare alveolar  
261 septal necrosis, mild proliferation of AT2 cells, and sporadic regional pulmonary edema  
262 (Fig. 3G, H). SARS-CoV-2 protein and RNA were occasionally still abundant in several  
263 animals, but predominated in histologically normal parenchyma, with minimal to rare

264 detection in areas of prominent inflammation (Fig. 4D, I and Table 1, and Table S1).  
265 Taken together, this suggested progressive resolution of viral infection by the host  
266 consistent with declining viral loads and absence of culturable infectious virus at this  
267 timepoint (Fig. 1E, F).

268 In the two survivors euthanized at 14 dpi, persistent mild to moderate lymphohistiocytic  
269 interstitial pneumonia was observed, with formation of sporadic lymphoid aggregates and  
270 mild persistence of AT2 hyperplasia (Fig. 3I, J). SARS-CoV-2 protein or RNA were no  
271 longer detectable at 14 dpi (Fig 4E, J).

272 Of note, no evidence of SARS-CoV-2 infection was observed in bronchiolar epithelium  
273 and pulmonary vasculature at any time during the study (Figs. 3 and 4, and Table 1, and  
274 Table S1). Similarly, hyaline membranes, vascular thrombosis, and syncytial cells were  
275 not observed at any time point across all animals, which contrasts with severe disease  
276 described in human autopsies (43) and non-human primate studies (44, 45). In one  
277 animal (7 dpi), there was localized flooding of bronchioles by degenerate neutrophils and  
278 cellular debris mixed with birefringent foreign material consistent with aspiration  
279 pneumonia, a rare complication previously reported in K18 hACE2 mice infected with  
280 SARS-CoV-1 that was ultimately attributed to pharyngeal and laryngeal dysfunction  
281 secondary to central nervous system (CNS) disease (36).

282 Altogether, our data displays evidence of a significant but moderate lymphohistiocytic  
283 interstitial pneumonia in SARS-CoV-2 infected K18-hACE2 mice. Histopathological  
284 features contrast with those observed in severe cases of COVID-19 in humans and  
285 suggest that the lethality observed in this model is in part independent of virally induced  
286 lung injury and resultant pneumonia.

287

288 **Pulmonary SARS-CoV-2 replication occurs exclusively in AT1 and AT2 cells.**

289 Subsequently, we aimed to further investigate SARS-CoV-2 tropism in the lower  
290 respiratory tract of K18-hACE2 mice. We first performed qualitative multiplex IHC to probe  
291 the localization of SARS-CoV-2 protein in AT1 cells (cell marker: receptor for advanced  
292 glycation end-products [RAGE]), AT2 cells (cell marker: surfactant protein C [SPC]), and  
293 endothelial cells (cell marker: CD31). SARS-CoV-2 protein was restricted within RAGE+  
294 AT1 and SPC+ AT2 pneumocytes, but not with CD31+ endothelial cells (Fig. 5A-C).  
295 Transmission electron microscopy (TEM) corroborated our IHC and ISH data, where we  
296 observed viral protein and RNA exclusively within the cytoplasm of squamous and  
297 cuboidal pneumocytes. Double membrane-bound vesicles (DMVs) and virus particles  
298 were exclusively observed in cells containing abundant caveolae (AT1 cells) or lamellar  
299 bodies (AT2 cells) by transmission electron microscopy (Fig. 5D-F). No viral particles or  
300 replication intermediates were observed in bronchiolar epithelial cells (Fig. 5G, H) or  
301 vascular endothelium. Of note, cubic membranes were a distinctive feature only observed  
302 in AT1 pneumocytes (Fig 5E).

303

304 **Effective control of SARS-CoV-2 infection in the lower respiratory tract is**  
305 **associated with recruitment of macrophage and to a lesser degree cytotoxic T**  
306 **cells.**

307 Next, we quantitatively characterized the cell density of inflammatory cells (cells/ $\mu\text{m}^2$ )  
308 targeting macrophages (Iba1), cytotoxic T cells (CD8), B cells (CD19) and total area  
309 immunoreactivity (% area  $\mu\text{m}^2$ ) of viral protein (Spike) in the lungs of SARS-CoV-2

310 infected K18-hACE2 mice (Fig. 6A-H). SARS-CoV-2 S immunoreactivity peaked between  
311 4-7 dpi (Fig. 6A), supporting a positive correlation between viral infection and the  
312 progressive inflammatory cell infiltrate, but was not statistically significant across groups.  
313 We attribute this finding to our low sample size for quantitative whole slide analysis,  
314 especially at 2 and 4 dpi, and individual animal variability likely represented by the  
315 inherent heterogeneity of viral pneumonia. Iba1+ macrophages represented the  
316 predominant inflammatory infiltrate across all time points with a temporal increase  
317 peaking at 7 dpi ( $p=0.0044$  compared to sham inoculated mice, Fig. 6B, G). Cytotoxic T  
318 cells were the second most abundant inflammatory infiltrate quantified, which also  
319 displayed a temporal increase peaking around 4-7 dpi (Fig. 6C, F-G); however, these  
320 cells were present at a ~10-fold reduced frequency compared to macrophages and  
321 statistical significance was not observed across timepoints, suggesting an early and  
322 plateaued response of this inflammatory population. B cells were elevated by 7 dpi but  
323 reached peak cell density at 14 dpi (Fig. 6D, H), the only time point where discrete  
324 lymphoid aggregates were observed histologically ( $p\leq 0.0001$  compared to sham  
325 inoculated mice). Altogether, our data suggest that a strong and persistent myeloid  
326 infiltrate and, to a lesser degree, cytotoxic T cells are important contributors to the decline  
327 of viral load that occurs in the lungs between 4-7 dpi, with B cells potentially being involved  
328 if animals survive the acute stage of disease. Of note, minimal inflammatory cells were  
329 observed in sham-inoculated K18-hACE2 mice supporting that the two survivors were de-  
330 facto infected with SARS-CoV-2 (Fig. 6E), which was further supported by the presence  
331 of neutralizing antibodies in their serum as compared to naïve mice (Fig. 6I).

332



333 **SARS-CoV-2 exhibits extensive neuroinvasion with resultant neuronal**  
334 **degeneration and necrosis in K18-hACE2 mice.**

335 Pursuing our hypothesis that the lethality of the K18-hACE2 mice is associated with  
336 neuroinvasion, we analyzed sagittal sections of the whole head to characterize  
337 progression of histologic lesions and distribution of viral protein and RNA at different  
338 timepoints post-infection (2, 4, 6-7 and 14 dpi). Histologic alterations in the brain were  
339 severe and widespread by 7 dpi with involvement of the olfactory bulb and of the cerebrum  
340 (Fig.7), as well as of the cerebral cortex (most predominantly somatosensory and  
341 somatomotor areas), hippocampus (mainly CA1 region), midbrain (thalamus and  
342 hypothalamus), brainstem, and the dentate nucleus. Histologic findings included  
343 moderate to marked neuronal spongiosis, multifocal shrunken, angular, hypereosinophilic  
344 and pyknotic neuronal bodies with loss of Nissl substance/chromatolysis (neuronal  
345 degeneration and necrosis, Fig. 7J) and occasionally delimited by multiple glial cells  
346 (satellitosis). In the olfactory bulb, delicate lymphocytic perivascular cuffing (Fig. 7K) and  
347 a general increase in the number of reactive glial cells (gliosis) were evident in the  
348 neuroparenchyma neighboring areas of neuronal degeneration and necrosis. Notably, the  
349 cerebellum (cortical layers and associated white matter of the cerebellar folia) was spared  
350 of histologic changes (data not shown).

351 Neuronal morphologic changes directly correlated with abundant neuronal  
352 immunoreactivity for SARS-CoV-2 S protein and viral RNA, which was observed  
353 exclusively within neuronal cell bodies and processes (Figs. 7C, F, I, L, O, and 8A).  
354 SARS-CoV-2 protein and RNA had a widespread distribution throughout the brain in  
355 roughly 85% (11/13) of infected K18-hACE2 mice at 7 dpi, including neuronal bodies

356 within the cerebral cortex, CA1, CA2 and CA3 regions of the hippocampus, anterior  
357 olfactory nucleus, caudoputamen, nucleus accumbens, thalamic nuclei including  
358 hypothalamus, midbrain, pons and medulla oblongata nuclei (Fig. 8A). Few  
359 vestibulocochlear nerve fascicles showed immunoreactivity for viral protein; while no viral  
360 S protein or RNA was detected in areas spared of histological changes including the  
361 cerebellar cortex and white matter, optic nerve and retina, and the spiral ganglion of the  
362 inner ear (albeit the eye and inner ear were not present in most sections examined).  
363 SARS-CoV-2 S protein and RNA preceded histological findings with rare detection as  
364 early as 4 dpi in mitral and inner nuclear neurons of the olfactory bulb, as well as small  
365 clusters of neurons within the anterior olfactory nucleus and orbital area of the cerebral  
366 cortex (Figs. 7C, F, I, L, O, and 8A).

367 Using a NanoLuc expressing recombinant SARS-CoV-2 virus (rSARS-CoV-2 NL), we  
368 observed significant detection of bioluminescence in the brain of a representative K18-  
369 hACE2 mice at day 6 post-infection, which was associated with lower bioluminescence  
370 signal in the lungs at the same time point, consistent with our previous findings (Fig. 8B)  
371 and other reports (46). To better characterize the gliosis that was observed histologically  
372 in animals with abundant neuronal degeneration and necrosis we quantitatively  
373 characterized the total area immunoreactivity (% area  $\mu\text{m}^2$ ) of microglia (Iba-1),  
374 astrocytes (GFAP), and SARS-CoV-2 (S) in sagittal sections of whole brain (Fig. 9A-C).  
375 Total % area immunoreactivity for astrocytes (GFAP) and microglia (Iba1) dramatically  
376 increased at 7 dpi compared to sham inoculated negative controls (GFAP,  $p=0.0101$ ;  
377 Iba1,  $p=0.0327$ ), paralleling peak expression of SARS-CoV-2 S, which was also  
378 significantly increased compared to Sham inoculated negative controls ( $p=0.0351$ ; Fig.

379 9A-C). Notably, the morphology of microglial, which had delicate cytoplasmic processes  
380 in sham inoculated (Fig. 9B), 2 and 4 dpi mice, was replaced by broad shortened  
381 processes at 7 dpi (Fig. 9C). Morphological differences in astrocyte processes were more  
382 subtle, but still possessed broader and a more extensive branching pattern compared to  
383 2dpi, 4dpi, and sham inoculated negative controls (Fig. 9B, C). To confirm exclusive  
384 neuronal tropism, we performed TEM on an animal euthanized at 6 dpi that exhibited  
385 neurologic signs of disease in the form of tremors. Viral assembly was observed  
386 exclusively in neurons, with no detection in glial cells. The prominent histologic phenotype  
387 of neuronal spongiosis was characterized by profound accumulation of double membrane  
388 vesicles (DMVs) and virus particles, with loss of Nissl substance (degeneration) or  
389 nuclear pyknosis, karyolysis, and global electron dense transformation of the cytoplasm  
390 (necrosis) (Fig. 9D, E). Although viral assembly and/or particles were not observed in  
391 microglia or astrocytes, quantitative immunohistochemical analysis supports reactive  
392 microgliosis and astrogliosis that is temporally linked with peak neuroinvasion, suggesting  
393 that activation of these cells contributes to neuronal injury either through direct neurotoxic  
394 and/or loss of normal homeostatic neurotrophic mechanisms.

395 Considering the severe bladder distention noted at necropsy and proprioceptive deficits  
396 observed clinically, we examined the cervicothoracic and lumbosacral segments of the  
397 spinal cord. In 9/11 animals that died or were euthanized due to terminal disease, similar  
398 histologic findings were observed as those described in the brain, albeit with milder gliosis  
399 and lymphocytic perivascular cuffing (Fig. 10A). We also observed mild-to-moderate  
400 detection of viral protein in the spinal cord that predominated within neurons of the  
401 cervicothoracic segments (Fig. 10B, and Table 1 and Table S1). Finally, Luxol Fast Blue

402 was utilized to visualize the integrity of myelin following SARS-CoV-2 invasion in the brain  
403 and spinal cord at 7 dpi, with no evidence of demyelination noted (Fig. 10C).

404 Taken together, our data illustrate that SARS-CoV-2 infection of K18-hACE2 results in  
405 severe neuronal invasion of the CNS, via transport to the olfactory bulb originating from  
406 axonal processes traversing the ONE. Alternative and concurrent routes such as  
407 retrograde transport of other cranial nerves as well as parasympathetic and sympathetic  
408 sensory nerves cannot be ruled out, especially acknowledging the near diffuse distribution  
409 of virus in the brain at terminal stages of disease, with the exception of the cerebellum.  
410 Viral neuroinvasion resulted in extensive neuronal cytopathic effect in infected cells that  
411 ultimately resulted in cell death, comprising not only the brain but also the spinal cord.  
412 Further research is warranted to characterize the role of uninfected but reactive microglia  
413 and astrocytes in SARS-CoV-2 neuronal injury using a multidimensional approach  
414 including molecular and functional testing.

415

416 **ACE2 expression and distribution does not fully reflect SARS-CoV-2 tissue tropism**  
417 **in K18-hACE2 mice.**

418 To further explore the mechanism driving lethal SARS-CoV-2 infection in K18-hACE2  
419 mice, we first investigated the tissue and cellular distribution of the ACE2 receptor in both  
420 C57BL/6J and K18-hACE2 mice by IHC (Fig. 11A-L) using a cross-reactive anti-ACE2  
421 antibody (cross-reactive to hACE2 and mACE2) (Table S2). In the lower respiratory tract  
422 (lungs), ACE2 was ubiquitously expressed along the apical membrane of bronchiolar  
423 epithelium and, less commonly, in rare and scattered AT2 pneumocytes (Fig. 11A-C). No  
424 ACE2 expression was found in AT1 pneumocytes. No evident differences in the

425 distribution and abundance of ACE2 expression were identified between uninfected  
426 C57BL/6J, sham-inoculated K18-hACE2, and terminal (7 dpi) K18-hACE2 mice  
427 inoculated with SARS-CoV-2.

428 We therefore aimed at analyzing expression and distribution of *hACE2* mRNA using  
429 RNAscope® ISH (Fig.12). Although no expression of *hACE2* mRNA was detected in the  
430 lungs of non-transgenic C57BL/6J mice (Fig. 12A), expression of *hACE2* mRNA was  
431 detectable, but of low expression in the lungs of K18-hACE2 mice, and mostly involved  
432 bronchiolar epithelial cells with sporadic expression in AT2 pneumocytes (Fig. 12B,C).  
433 These findings therefore suggest that *hACE2* expression might not be the sole host factor  
434 determinant of susceptibility to SARS-CoV-2. This is clearly exemplified by the following:  
435 1) certain cell types that, while expressing *hACE2*, were non-permissive to SARS-CoV-2  
436 infection throughout the experiment (i.e. bronchiolar epithelial cells); and 2) the near  
437 diffuse infection of AT1 cells by 4 dpi despite absent expression of *hACE2* in these cells.  
438 Altogether, these observations then support evidence for an ACE2-independent viral  
439 entry mechanism playing a major role in the pulmonary dissemination of K18-hACE2  
440 mice.

441 In contrast to the lung, ACE2 protein was clearly overexpressed in the nasal cavity of  
442 K18-hACE2 mice compared to C57BL/6J mice. We assessed ACE2 protein expression  
443 on the rostral transitional epithelium, respiratory epithelium at the level of the intermediate  
444 turbinates, as well as in the ONE and olfactory bulb (Fig. 11D-F, G-I). Unlike C57BL/6J  
445 mice, in which ACE2 was undetectable within the nasal cavity, ACE2 protein was diffusely  
446 expressed within the apical membrane of transitional and respiratory epithelium, and  
447 segmentally within the apical surface of the ONE in both sham-inoculated and SARS-

448 CoV-2-infected K18-hACE mice (Fig. 11D-F). For the olfactory bulb, olfactory  
449 neuroepithelium and respiratory epithelium of rostral turbinates, estimation of *hACE2*  
450 abundance and distribution could not be accurately assessed since the decalcification  
451 procedure is believed to have had a significant impact in the quality of cellular mRNA as  
452 demonstrated by the low detection of the housekeeping mRNA, *Ppib* (data not shown).

453 In the brain of both C57BL/6J and K18-hACE2 mice, ACE2 protein was observed in the  
454 vascular endothelium lining blood vessels (Fig. 11J-L), as well as ependymal and choroid  
455 plexus epithelium. In contrast, distribution of *hACE2* mRNA expression involved clusters  
456 of neurons within the cerebral cortex, hippocampus, midbrain, brainstem, and Purkinje  
457 cells from the cerebellum, with no expression noted in non-transgenic C57BL/6J mice  
458 (Fig. 12D-F). There was no expression of *hACE2* mRNA in vascular endothelial cells.

459 Taken together, our data show a discrepancy between ACE2 protein and RNA expression  
460 and distribution within the CNS. This is partly attributable to the fact that the ACE2  
461 antibody we utilized cross reacts with both hACE2 and mACE2 proteins, while the ACE2  
462 probe employed was human specific. The absence of *hACE2* hybridization with  
463 simultaneous ACE2 immunoreactivity in the capillary endothelium supports the notion that  
464 ACE2 expression in these cells is of murine origin. The absence of ACE2  
465 immunoreactivity in neurons is suggestive of a potential restriction in the translation (or  
466 post-translation) of the ACE2 protein in these cells. This, in addition to the fact that  
467 Purkinje cells of the cerebellum do not appear permissive to SARS-CoV-2 infection  
468 despite the low expression of *hACE2* mRNA, suggests that ACE2 is likely not the sole  
469 host factor associated with neuroinvasion and that other ACE2-independent entry  
470 mechanisms contribute to neuroinvasion and spread by SARS-CoV-2 in this murine

471 model. Alternatively, and/or in parallel, the overexpression of ACE2 protein within the  
472 nasal passages may be sufficient to enhance neuroinvasion by enhancing axonal  
473 transport via the ONE.

474

475 **Absence of infection and histologic lesions in extrapulmonary and extraneural**  
476 **tissues despite ACE2 expression.** Other tissues examined included heart, kidney,  
477 stomach, duodenum, jejunum, ileum, cecum, and colon. All of these were histologically  
478 within normal limits (data not shown). No SARS-CoV-2 S protein was detected in any of  
479 these tissues at any time point (Table 1). ACE2 distribution was evaluated in sections of  
480 the heart, stomach, small intestine, and colon. While ACE2 expression was limited to the  
481 capillary vascular endothelium in the heart and glandular stomach, intense expression  
482 was noted in the non-glandular mucosa of the stomach (Fig.13 A-C) and apical surface  
483 of enterocytes lining the small intestinal mucosa (Fig.13 D-F). Colonic enterocytes rarely  
484 expressed ACE2 (Fig. 13G-I).

485

## 486 **DISCUSSION**

487 The K18-hACE2 transgenic mouse model has become a widespread laboratory animal  
488 model suitable for studying SARS-CoV-2 pathogenesis as well as medical  
489 countermeasures against COVID-19 (20). The suitability of this model relies on the  
490 common host entry receptor shared between SARS-CoV and SARS-CoV-2 (20, 39), and  
491 transgenic mice expressing hACE2 under the K18 promoter develop lethal clinical  
492 disease associated with pulmonary pathology and neuroinvasion, with high viral titers (30,  
493 36-38, 40, 47-49). In contrast, other murine models of SARS-CoV-2 (e.g. adenovirus-  
494 transduced hACE2 mice and hACE2 knock-in mice) develop only mild disease with

495 limited and short-lived viral replication and pulmonary pathology, and low to no lethality  
496 (37, 50). While the K18-hACE2 murine model has been critical in shedding light on  
497 mechanisms of lung injury and dysfunction, it fails to faithfully recapitulate several key  
498 histologic features of severe and lethal cases of COVID-19 in humans, such as diffuse  
499 alveolar damage (DAD) with hyaline membrane formation and multi-organ failure  
500 associated with hypercoagulability and widespread microthrombi formation (43, 51).

501 To better understand the pathogenesis of SARS-CoV-2, well-characterized animal  
502 models are critically needed (22). Even though the K18-hACE2 murine model is currently  
503 under extensive use, several aspects associated with the temporospatial dynamics of  
504 SARS-CoV-2 infection remain poorly characterized, including the expression and cellular  
505 distribution of hACE2. In this work we further characterized pathological aspects related  
506 to viral pathogenesis in this unique murine model and hypothesized that the  
507 temporospatial distribution of SARS-CoV-2 and pathological outcomes following infection  
508 in the K18-hACE2 murine model is partially but not solely associated with hACE2 and  
509 that increased lethality in this model is related to neuroinvasion. The study presented  
510 herein provides additional novel information regarding the temporal and spatial aspects  
511 of SARS-CoV-2 infection in the K18-hACE2 mouse model with emphasis on pathological  
512 outcomes as well as a thorough and methodical characterization of ACE2 expression in  
513 this transgenic mouse model, which contributes to our understanding of this critical model  
514 used for preclinical evaluation of vaccines and antiviral therapeutics. Our findings not only  
515 demonstrate that lethality of this murine model is associated with neuroinvasion and  
516 subsequent neuronal cytopathic effect, but that SARS-CoV-2 tropism is not solely



517 restricted to ACE2-expressing cells in K18-hACE2 mice. Thus, the neuropathogenic  
518 potential of SARS-CoV-2 is dependent on other currently unknown host factors.

519 Herein, we utilized a large cohort of K18-hACE2 mice enrolled in either a 14-day natural  
520 history or pre-determined serial euthanasia study to sequentially evaluate SARS-CoV-2  
521 tropism and pathological alterations, spatial and temporal analysis of host factors  
522 including inflammatory response and *ACE2/hACE2* expression, and several clinical  
523 indices. Survival curve analysis demonstrated that lethality in infected mice only occurs  
524 at or after 6 dpi, and in most mice (~94%), coincided with the initiation of neurologic signs  
525 and/or symptoms, neuronal cytopathic effect, and abundance of viral S protein, RNA, and  
526 infectious viral particles in the CNS. These observations clearly indicate neuroinvasion as  
527 a key determinant in the fatal outcome affiliated with this model. Our study also  
528 demonstrates that SARS-CoV-2 has a tropism for neurons within the spinal cord  
529 (predominantly within the cervicothoracic segments), which was only observed in mice  
530 with severe concurrent brain involvement. This observation could reflect descending  
531 progression originating from the brain, or alternatively axonal transport via motor or  
532 sympathetic sensory fibers. Concurrent brain and spinal cord disease rationalize the  
533 neurologic signs observed with this model, which included decreased  
534 mobility/responsiveness and decreased urine voiding, reflective of severe urinary bladder  
535 dilation and accumulation of concentrated urine. Given the spinal cord involvement, the  
536 latter is potentially attributed to altered spinal reflexes and/or decreased intervention of  
537 the detrusor muscle, which is required for normal micturition. An additional striking clinical  
538 feature in infected K18-hACE2 mice at 7 dpi was hypothermia, which is likely a  
539 consequence of hypothalamic (controls thermoregulation) and generalized neuronal

540 dysfunction associated with SARS-CoV-2 neurotropism and serves as a clear clinical  
541 indicator of CNS involvement in this model. Our results unequivocally demonstrate that  
542 neuroinvasion is a major driver of fatality in this animal model compared to others such  
543 as Syrian hamsters, which display more severe pulmonary disease and infection of the  
544 ONE but lack evidence of neuroinvasion (52). Furthermore, these animals invariably  
545 recover within 14 days following intranasal infection with SARS-CoV-2 (24, 29, 52-54).  
546 Very few infected K18-hACE2 mice (2/30) from our survival curve study (14 dpi) survived  
547 and, while residual pulmonary inflammation was observed, these animals did not exhibit  
548 any evidence of neuroinvasion. Uniquely, both survivors developed pulmonary interstitial  
549 aggregates of B lymphocytes which were not observed at earlier time points, suggestive  
550 of the development of protective adaptive humoral response further supported by  
551 presence of neutralizing antibodies in these two animals, when compared to naïve  
552 animals. The absence of any overt neurological clinical signs, normal histologic  
553 appearance of the CNS and, absence of detectable SARS-CoV-2 protein or RNA in the  
554 two surviving mice supports the notion that animals can either fully recover from a milder  
555 form of neuroinvasion, or more likely, that in rare instances neuroinvasion fails to occur  
556 for unknown reasoning. Furthermore, we acknowledge that extensive neurobehavior  
557 testing, which is beyond the expertise of the authors, would be required to rule out any  
558 long-term neurological sequelae in the rare instance of survivors. Overall, these findings  
559 are of importance to researchers with a particular interest in studying SARS-CoV-2-  
560 associated neuropathogenesis, as premature euthanasia due to other clinical features  
561 (i.e., weight loss, ruffled fur, and/or respiratory distress) have the potential to precede  
562 CNS disease. Such terminal endpoints, if elected, may preclude evaluation of the effects

563 of SARS-CoV-2 in the CNS. Instead, decreased responsiveness/mobility, tremors, and  
564 hypothermia should be interpreted to reflect better clinical findings supportive of  
565 neuroinvasive disease.

566 To date, the precise mechanism(s) enabling neuroinvasion in the K18-hACE2 model is  
567 poorly understood (11, 13, 15, 16, 52). Here, we determined that K18-hACE2 transgenic  
568 mice show a significant upregulation in the expression of ACE2 in the nasal cavity  
569 compared to wild-type C57BL/6J mice, in which ACE2 expression is undetectable by IHC.  
570 This difference between K18-hACE2 and C57BL/6J mice is clearly attributed to the  
571 expression of the *hACE2* transgene and is a key feature to the neuropathogenesis of this  
572 model. Interestingly, temporal analysis of SARS-CoV-2 S protein and RNA in the ONE of  
573 transgenic mice preceded and/or occurred simultaneously with infection of neurons within  
574 the glomerular and mitral layers of the olfactory bulb, supporting axonal transport through  
575 the cribriform plate as a primary portal of neuroinvasion. Expression of *hACE2* within  
576 neurons in the CNS is overall low and does not directly correlate with our  
577 immunohistochemical findings, where ACE2 protein was restricted to capillary  
578 endothelium, ependymal and choroid epithelium with sparing of neurons and their  
579 processes. These findings suggest the ACE2 expression in these anatomical  
580 compartments could be attributed to *mACE2* and/or indicative of a post-transcriptional  
581 event that could be limiting neuronal expression of *hACE2*. These along with the fact that  
582 *hACE2* mRNA is not abundantly and equally expressed among different neuronal  
583 populations and that Purkinje cells in the cerebellum express *hACE2* mRNA but are not  
584 permissive to SARS-CoV-2 infection, suggest that entry of SARS-CoV-2 into neurons is  
585 likely mediated by other host receptors independent of ACE2. Alternatively,

586 overexpression at the interface of the ONE and neuronal synapses may be sufficient to  
587 rationalize the severe neuroinvasion observed in this model.

588 Infection of brain organoids has been shown to be inhibited using anti-ACE2 antibodies  
589 (19). However, brain organoids do not recapitulate the complexity of the entire CNS, and  
590 axonal transport of viral particles into the CNS can hardly be modeled *in vitro*. Altogether,  
591 this suggests that while ACE2 is assuredly an important mediator of CNS neuroinvasion,  
592 studying mechanisms of SARS-CoV-2 neuroinvasion likely require the use of more  
593 complex experimental systems. Neuropilin-1, a transmembrane glycoprotein serving as  
594 cell surface receptor for semaphorins and other ligands, as well as Tetraspanin 8  
595 (TSPAN8), have recently been proposed as alternative host receptors for SARS-CoV-2  
596 entry (55, 56). Even though we analyzed the expression of neuropilin-1 in this study (data  
597 not shown), we observed ubiquitous expression in the nasal passages, brain, kidneys,  
598 liver, and lungs, precluding any definitive conclusions in support or against these claims  
599 (55).

600 Anosmia and ageusia (loss of smell and taste, respectively) represent the earliest and  
601 most common but transient neurologic symptoms in people with COVID-19, being  
602 reported in  $\geq 50\%$  of cases (12, 13, 17). Hyposmia or anosmia has also been clearly  
603 characterized in K18-hACE2 mice, occurring between 2-3 dpi, which was characterized  
604 through a series of unique behavioral tests requiring a normal sense of smell (38). Other  
605 neurologic manifestations of COVID-19 have been attributed to acute cerebrovascular  
606 disease, with cohort studies reporting strokes in 2–6% of hospitalized patients (7, 13).  
607 Long-term neurologic sequelae associated with COVID-19 or its effect on  
608 neurodegenerative diseases remain unclear (7). Very little is known about the

609 pathogenesis of these neurologic manifestations and whether they are directly or  
610 indirectly associated with SARS-CoV-2. ACE2 expression has been described in humans  
611 both in health and with chronic rhinosinusitis, with expression noted in sustentacular cells  
612 of the ONE, but not within immature and mature olfactory neurons (57). This observation  
613 led the authors to suggest that anosmia in COVID-19 is likely attributable to an indirect  
614 effect of SARS-CoV-2 infection. However, recent studies evaluating the brain and nasal  
615 autopsies from patients who died of COVID-19, detected SARS-CoV-2 protein and RNA  
616 in cells of neural origin within the ONE and cortical neurons occasionally associated with  
617 locally ischemic regions (18, 19). These studies provide evidence that the K18-hACE2  
618 mice could have translational significance, even though ischemic lesions have not been  
619 reported including results from our study. Even though SARS-CoV-2 infects sustentacular  
620 cells within the neuroepithelium of Syrian hamsters (52), the K18-hACE2 and a transgenic  
621 mice expressing hACE2 under the HFH4 promoter are the only published models that  
622 consistently develop neuroinvasion with wild-type virus and, thus, will be particularly  
623 useful for studying SARS-CoV-2 neuropathogenesis, particularly the mechanisms of viral  
624 trafficking of into the CNS through the ONE (35).

625 Another important observation of the K18-hACE2 model is that SARS-CoV-2 tropism  
626 extensively involves infection of ACE2 and *hACE2* negative cells, including certain  
627 population of neurons and the vast majority of AT1 pneumocytes. Similarly, sole  
628 expression of *hACE2* in some cell types (i.e., CNS capillaries and bronchiolar epithelial  
629 cells) clearly does not render these cells susceptible to SARS-CoV-2 even following  
630 intranasal exposure and underscores the notion that other undetermined host factors are

631 likely required to allow viral entry. Therefore, this model is relevant for investigating the  
632 role of alternative ACE2-independent entry mechanisms.

633 In conclusion, this study provides a comprehensive spatiotemporal analysis of SARS-  
634 CoV-2 infection in the K18-hACE2 transgenic murine model along with an analysis of the  
635 contribution of ACE2 in the permissiveness of the model. Our work provides extensive  
636 evidence that SARS-CoV-2 exhibits a marked neurotropism that is associated with  
637 lethality, and that this process likely occurs through mechanisms that are in part hACE2-  
638 independent. Although we documented significant reactive microgliosis and astrogliosis  
639 in terminal neuroinvasive disease, the exact role and molecular determinants of these  
640 observations, and their role in neuronal injury of the K18hACE2 model warrants further  
641 research. Lethal CNS invasion, combined with the absence of severe pulmonary  
642 hallmarks associated with lethal COVID-19, therefore calls for attentive caution when  
643 utilizing the K18-hACE2 mouse model to investigate certain aspects of SARS-CoV-2  
644 pulmonary pathogenesis. Furthermore, due to the acute and fulminant neuroinvasion of  
645 this model, the protective ability of anti-viral therapies and T-cell based vaccines against  
646 lethal challenge in this model might indeed be underestimated, which is reflected in  
647 several studies that have utilized terminal timepoints preceding neuroinvasion as their  
648 efficacy endpoints (58-60). Regardless, the K18-hACE2 mouse model represents a  
649 promising model for understanding the mechanisms governing SARS-CoV-2  
650 neuroinvasion, ACE2-independent virus entry, and evaluating potent and fast-acting  
651 prophylactic countermeasures. Lastly, this model may serve useful in evaluating efficacy  
652 of therapeutics to block development of reactive/injurious microglial and/or astrocyte  
653 phenotypes if determined to play a key role in the neuronal injury observed in this model.

654

## 655 **MATERIALS AND METHODS**

656 **Biosafety.** All aspects of this study were approved by the Institutional Biosafety  
657 Committee and the office of Environmental Health and Safety at Boston University prior  
658 to study initiation. Work with SARS-CoV-2 was performed in a biosafety level-3 laboratory  
659 by personnel equipped with powered air-purifying respirators.

660 **Cells and viruses.** African green monkey kidney Vero E6 cells (ATCC<sup>®</sup> CRL-1586<sup>™</sup>,  
661 American Type Culture Collection, Manassas, VA) were maintained in Dulbecco's  
662 minimum essential medium (DMEM; Gibco, Carlsbad, CA [#11995-065]) containing 10%  
663 fetal bovine serum (FBS, ThermoFisher Scientific, Waltham, MA), 1X non-essential amino  
664 acids (ThermoFisher Scientific), penicillin and streptomycin (100 U/ml and 100 µg/ml),  
665 and 0.25 µg/ml of amphotericin B (Gibco<sup>®</sup>, Carlsbad, CA), and incubated at 37 °C and  
666 5% CO<sub>2</sub> in a humidified incubator.

667 **SARS-CoV-2 isolate stock preparation and titration.** All replication-competent SARS-  
668 CoV-2 experiments were performed in a biosafety level 3 laboratory (BSL-3) at the Boston  
669 University' National Emerging Infectious Diseases Laboratories. 2019-nCoV/USA-  
670 WA1/2020 isolate (NCBI accession number: MN985325) of SARS-CoV-2 was obtained  
671 from the Centers for Disease Control and Prevention (Atlanta, GA) and BEI Resources  
672 (Manassas, VA). To generate the passage 1 (P1) virus stock, Vero E6 cells, pre-seeded  
673 the day before at a density of 10 million cells, were infected in T175 flasks with the master  
674 stock, diluted in 10 ml final volume of Opti-MEM (ThermoFisher Scientific). Following virus  
675 adsorption to the cells at 37 °C for 1 h, 15 ml DMEM containing 10% FBS and 1X  
676 penicillin/streptomycin was added to the flask. The next day, media was removed, the cell

677 monolayer was rinsed with 1X phosphate buffered saline (PBS) pH 7.5 (ThermoFisher  
678 Scientific) and 25 ml of fresh DMEM containing 2% FBS was added. Two days later, when  
679 the cytopathic effect of the virus was clearly visible, culture medium was collected, filtered  
680 through a 0.2  $\mu\text{m}$  filter, and stored at  $-80\text{ }^{\circ}\text{C}$ . Our P2 working stock of the virus was  
681 prepared by infecting Vero E6 cells with the P1 stock, at a multiplicity of infection (MOI)  
682 of 0.1. Cell culture media was harvested at 2 and 3 dpi, and after the last harvest,  
683 ultracentrifuged (Beckman Coulter Optima L-100k; SW32 Ti rotor) for 2 h at 25,000 rpm  
684 ( $80,000\text{ }X\text{ }g$ ) over a 20% sucrose cushion (Sigma-Aldrich, St. Louis, MO). Following  
685 centrifugation, the media and sucrose were discarded, and pellets were left to dry for 5  
686 minutes at room temperature. Pellets were then resuspended overnight at  $4\text{ }^{\circ}\text{C}$  in 500  $\mu\text{l}$   
687 of 1X PBS. The next day, concentrated virions were aliquoted and stored at  $-80\text{ }^{\circ}\text{C}$ .  
688 The titer of our viral stock was determined by plaque assay. Vero E6 cells were seeded  
689 into a 12-well plate at a density of  $2.5 \times 10^5$  cells per well and infected the next day with  
690 serial 10-fold dilutions of the virus stock for 1 h at  $37\text{ }^{\circ}\text{C}$ . Following virus adsorption, 1 ml  
691 of overlay media, consisting of 2X DMEM supplemented with 4% FBS and mixed at a 1:1  
692 ratio with 1.2% Avicel (DuPont; RC-581), was added in each well. Three days later, the  
693 overlay medium was removed, the cell monolayer was washed with 1X PBS and fixed for  
694 30 minutes at room temperature with 4% paraformaldehyde (Sigma-Aldrich). Fixed cells  
695 were then washed with 1X PBS and stained for 1h at room temperature with 0.1% crystal  
696 violet (Sigma-Aldrich) prepared in 10% ethanol/water. After rinsing with tap water, the  
697 number of plaques were counted, and the virus titer was calculated. The titer of our P2  
698 virus stock was  $4 \times 10^8$  plaque forming units (PFU)/ml.



699 **Recombinant SARS-CoV-2 NanoLuciferase stock.** Recombinant SARS-CoV-2 virus  
700 expressing a NanoLuciferase reporter (rSARS-CoV-2 NL) (61) was generously provided  
701 by the Laboratory of Pei-Yong Shi. A day prior to propagation 10 million Vero E6 cells  
702 were seeded in a T-175 flask. To grow virus, 10  $\mu$ l of rSARS-CoV-2 NL virus stock was  
703 diluted in 10 ml of OptiMEM media (ThermoFisher Scientific, #51985091) and then added  
704 to cells. Virus was incubated on cells for 1 hour at 37°C then 15 mL of DMEM containing  
705 10% FBS and 1% penicillin/streptomycin was added. The morning after infection, media  
706 was removed, cells were washed once with 1X PBS and 25 ml of fresh DMEM containing  
707 2% FBS and 1% penicillin/streptomycin was added to the flask. Virus was incubated for  
708 an additional 48 hours, supernatant was collected, filtered through a 0.22  $\mu$ M filter, and  
709 stored at -80°C. To concentrate virus, the stock was thawed and concentrated by  
710 ultracentrifugation (Beckman Coulter Optima L-100k; SW32 Ti rotor) at 25,000 x g for 2  
711 hours at 4 °C on a 20% sucrose cushion (Sigma-Aldrich, St. Louis, MO). Media and  
712 sucrose were decanted, pellets were allowed to dry for 5 minutes at room temperature,  
713 then viral pellets were suspended in 100  $\mu$ l of 1X PBS and left at 4 °C overnight. The next  
714 day, concentrated virus was aliquoted and stored at -80 °C.

715 **Mice.** Mice were maintained in a facility accredited by the Association for the Assessment  
716 and Accreditation of Laboratory Animal Care (AAALAC). All protocols were approved by  
717 the Boston University Institutional Animal Care and Use Committee (PROTO202000020).  
718 Heterozygous K18-hACE2 C57BL/6J mice of both sexes (strain: 2B6.Cg-Tg(K18-  
719 ACE2)2PrImn/J) were obtained from the Jackson Laboratory (Jax, Bar Harbor, ME).  
720 Animals were group-housed by sex in Tecniplast green line individually ventilated cages

721 (Tecniplast, Buguggiate, Italy). Mice were maintained on a 12:12 light cycle at 30-70%  
722 humidity and provided ad-libitum water and standard chow diets (LabDiet, St. Louis, MO).  
723 **Intranasal inoculation with SARS-CoV-2.** At 4 months of age, K18-hACE2 mice of both  
724 sexes were intranasally inoculated with  $1 \times 10^6$  PFU of SARS-CoV-2 in 50  $\mu$ l of sterile 1X  
725 PBS (n=61 [n=34 male and n=27 female], or sham inoculated with 50  $\mu$ l of sterile 1X PBS  
726 (n=3; female). Inoculations were performed under 1-3% isoflurane anesthesia. Thirty-  
727 eight of these animals were enrolled in a 14-day survival curve study. For histologic  
728 analysis, twenty-six animals were examined (n=15 male and n=11 female), which  
729 included three female Sham/PBS inoculated controls and predetermined euthanasia  
730 timepoints at 2 and 4 dpi prior to animals reaching euthanasia criteria.

731 **Clinical monitoring.** Animals included in the 14-day survival curve study were  
732 intraperitoneally implanted with an RFID temperature-monitoring microchip (Unified  
733 Information Devices, Lake Villa, IL, USA) 48-72 hours prior to inoculation. An IACUC-  
734 approved clinical scoring system was utilized to monitor disease progression and  
735 establish humane endpoints (Table 2). Categories evaluated included body weight,  
736 general appearance, responsiveness, respiration, and neurological signs for a maximum  
737 score of 5. Animals were considered moribund and humanely euthanized in the event of  
738 the following: a score of 4 or greater for 2 consecutive observation periods, weight loss  
739 greater than or equal to 20%, severe respiratory distress, or lack of responsiveness.  
740 Clinical signs and body temperature were recorded once per day for the duration of the  
741 study. For design of the survival curve, animals euthanized on a given day were counted  
742 dead the day after. Animals found dead in cage were counted dead on the same day.

743 **In vivo 3D-imaging and analysis.** K18-hACE2 mice were infected with  $1 \times 10^6$  PFU of  
744 SARS-CoV-2 NL in 50  $\mu$ l of 1X PBS via intranasal inoculation. To image, mice were  
745 administered two, 75  $\mu$ l subcutaneous injections of 1X PBS containing 0.65  $\mu$ M  
746 Fluorofurimazine (FFz) substrate (Promega) for a total of 1.3  $\mu$ M FFz per mouse. Mice  
747 were then imaged using a 3D-imaging mirror gantry isolation chamber (InVivo Analytics)  
748 and an IVIS spectrum imager (PerkinElmer). To perform imaging, mice were anesthetized  
749 with 2.5% isoflurane, placed into a body conforming animal mold (BCAM) (InVivo  
750 Analytics), and then imaged within 5 minutes of FFz injection. Images were acquired  
751 using a sequence imaging as followed; 60 seconds (s) open filter, 240 s 600 nm, 60 s  
752 open, 240 s 620 nm, 60 s open, 240 s 640 nm, 60 s open, 240 s 660 nm, 60 s open, 680  
753 nm, 60 s open. Data analysis was performed using the cloud-based InVivoPlot software  
754 (InVivo Analytics).

755 **Tissue processing and viral RNA isolation.** Tissues were collected from mice and  
756 stored in 600  $\mu$ l of RNA $later$  (Sigma-Aldrich; # R0901500ML) and stored at -80  $^{\circ}$ C. For  
757 processing, 20 – 30 mg of tissue were placed into a 2 ml tube with 600  $\mu$ l of RLT buffer  
758 with 1%  $\beta$ -mercaptoethanol and a 5 mm stainless steel bead (Qiagen, Valencia, CA;  
759 #69989). Tissues were then dissociated using a Qiagen TissueLyser II (Qiagen) with the  
760 following cycle parameters: 20 cycles/s for 2 min, 1 min wait, 20 cycles/s for 2 min.  
761 Samples were centrifuged at 17,000 X g (13,000 rpm) for 10 minutes and supernatant  
762 was transferred to a new 1.5 ml tube. Viral RNA isolation was performed using a Qiagen  
763 RNeasy Plus Mini Kit (Qiagen; #74134), according to the manufacturer's instructions, with  
764 an additional on-column DNase treatment (Qiagen; #79256). RNA was finally eluted in  
765 30  $\mu$ l of RNase/DNase-free water and stored at -80  $^{\circ}$ C until used.

766 **Quantification of infectious particles by plaque assay.** Quantification of SARS-CoV-  
767 2 infectious particles were quantified by plaque assay. After euthanizing mice, tissues  
768 were collected in 600  $\mu$ L of RNA $later$  (ThermoFisher Scientific, AM7021) and stored at -  
769 80 C until analysis. The day prior to experiments, 24-well plates containing  $8 \times 10^4$  Very  
770 E6 cells per well were plated. Between 20-40 mg of tissue was weighed out and placed  
771 into a 2 ml tube containing 500  $\mu$ l of OptiMEM (ThermoFisher) and a 5mm Steal Bead  
772 (Qiagen #69997). Tissues were then homogenized using a Qiagen TissueLyser II  
773 (Qiagen; Germantown, MD) by two dissociations cycles (two-minutes at 1,800  
774 oscillations/minute) with a one-minute rest in between. Samples were then subject to  
775 centrifugation with a benchtop centrifuge at 13,000 rpm for 10 minutes and supernatant  
776 was transferred to a new 1.5 ml tube. From this, 1:10 – 1:10<sup>6</sup> dilutions were made in  
777 OptiMEM and 200  $\mu$ l of each dilution were plated onto 24-well plates. Media was  
778 incubated at 37 °C for 1 hour with gentle rocking of the plate every 10 minutes. After viral  
779 adsorption, 800  $\mu$ l of a 1:1 mixture of 2X DMEM containing 4% FBS 1%  
780 penicillin/streptomycin and 2.4% Avicel (Dupont) was overlaid into each well. Cells were  
781 then incubated for 72 hours at 37°C with 5% CO<sub>2</sub>. After incubation, Avicel was removed,  
782 cells were washed with 1X PBS, and cells were fixed in 10% formalin for 1 hour. After  
783 fixation, formalin was removed, cells were stained with 0.1% crystal violet in 10%  
784 ethanol/water for 30 minutes and washed with tap water. Plates were then dried, the  
785 number of plaques were counted, and infectious particles (PFU/mg of tissue) were  
786 calculated.

787 **RNA isolation from serum.** Total viral RNA was isolated from serum using a Zymo  
788 Research Corporation Quick-RNA™ Viral Kit (Zymo Research, Tustin, CA; #R1040)

789 according to the manufacturer's instructions. RNA was eluted in 15 µl of RNase/DNase-  
790 free water and stored at -80 °C until used.

791 **SARS-CoV-2 E-specific reverse transcription quantitative polymerase chain**  
792 **reaction (RT-qPCR).** Viral RNA was quantitated using single-step RT-quantitative real-  
793 time PCR (Quanta qScript One-Step RT-qPCR Kit, QuantaBio, Beverly, MA; VWR;  
794 #76047-082) with primers and TaqMan® probes targeting the SARS-CoV-2 E gene as  
795 previously described (62). Briefly, a 20 µl reaction mixture containing 10 µl of Quanta  
796 qScript™ XLT One-Step RT-qPCR ToughMix, 0.5 µM Primer E\_Sarbeco\_F1  
797 (ACAGGTACGTTAATAGTTAATAGCGT), 0.5 µM Primer E\_Sarbeco\_R2  
798 (ATATTGCAGCAGTACGCACACA), 0.25 µM Probe E\_Sarbeco\_P1 (FAM-  
799 AACTAGCCATCCTTACTGCGCTTCG-BHQ1), and 2 µl of template RNA was  
800 prepared. RT-qPCR was performed using an Applied Biosystems QuantStudio 3  
801 (ThermoFisher Scientific) and the following cycling conditions: reverse transcription for  
802 10 minutes at 55 °C, an activation step at 94 °C for 3 min followed by 45 cycles of  
803 denaturation at 94 °C for 15 seconds and combined annealing/extension at 58 °C for 30  
804 seconds. Ct values were determined using QuantStudio™ Design and Analysis software  
805 V1.5.1 (ThermoFisher Scientific). For absolute quantitation of viral RNA, a 389 bp  
806 fragment from the SARS-CoV-2 E gene was cloned onto pIDTBlue plasmid under an SP6  
807 promoter using NEB PCR cloning kit (New England Biosciences, Ipswich, MA). The  
808 cloned fragment was then *in vitro* transcribed (mMessage mMachine SP6 transcription  
809 kit; ThermoFisher) to generate an RT-qPCR standard.

810 **Serum infectivity assay.** One day prior to the experiment,  $5 \times 10^4$  Vero E6 cells were  
811 plated into a 24-well plate. Cells were then dosed with 200 µl of OptiMEM containing 20

812  $\mu$ l of serum or SARS-CoV-2 WA-isolate (MOI=0.001 [positive control]), incubated for 1  
813 hour at 37°C, media was removed and fresh DMEM containing 2% FBS and 1%  
814 penicillin/streptomycin was added. Cells were incubated at 37°C with 5% CO<sub>2</sub> for 48  
815 hours, 100  $\mu$ l of supernatant was collected and RNA was extracted using a Quick-RNA  
816 Viral Kit as per manufacturer' instructions (Zymo Research) for analysis by RT-qPCR.

817 **Serum neutralization assay.** One day prior to the experiment,  $1 \times 10^4$  VeroE6 cells were  
818 plated into a 96-well plate. Serum was de-complemented at 56°C for 30 minutes. Serum  
819 was diluted 1:10 in OptiMEM and then serially diluted 2-fold for a total of ten-dilutions.  
820 Serum dilutions were mixed with SARS-CoV-2 NL virus (MOI=1), incubated for 1 hour at  
821 room temperature and then plated onto cells. After a 1-hour incubation at 37°C inoculum  
822 was removed and 200  $\mu$ l of fresh DMEM containing 2% FBS and 1%  
823 penicillin/streptomycin was added. After a 24h incubation at 37°C with 5% CO<sub>2</sub> media  
824 was removed and cells were fixed with 10% formalin for 1 hour. A SARS-CoV-2 spike  
825 neutralizing antibody (Sino Biological Inc.; 2 $\mu$ g/ $\mu$ L) was used as a positive control for  
826 neutralization. After fixation formalin was removed, cells were washed with 1X PBS and  
827 20  $\mu$ M furimazine (MedChem Express) luciferin substrate was added onto cells. Cells  
828 were then imaged using an IVIS spectrum imager (PerkinElmer) and analyzed using  
829 LivingImage software (PerkinElmer).

830 **Histology.** Animals were anesthetized with 1-3% isoflurane and euthanized with an  
831 intraperitoneal overdose of ketamine and xylazine before harvest and fixation of tissues.  
832 Lungs were insufflated with ~1.5mL of 1% low melting point agarose (Sigma-Aldrich)  
833 diluted in 1X PBS using a 24-gauge catheter placed into the trachea. The skull cap was  
834 removed and the animal decapitated and immersed in 10% neutral buffered formalin.

835 Additional tissues harvested included the heart, kidneys, and representative sections of  
836 the gastrointestinal tract, which included the duodenum, jejunum, ileum, cecum, and  
837 colon. Tissues were inactivated in 10% neutral buffered formalin at a 20:1 fixative to tissue  
838 ratio for a minimum of 72 hours before removal from BSL-3 in accordance with an  
839 approved institutional standard operating procedure. Following fixation, the whole head  
840 was decalcified in Immunocal™ Decalcifier (StatLab, McKinney, TX) for 7 days before  
841 performing a mid-sagittal section dividing the two hemispheres into even sections.  
842 Tissues were subsequently processed and embedded in paraffin following standard  
843 histological procedures. Five-micron sections were obtained and stained with  
844 hematoxylin and eosin or Luxol Fast Blue (myelin stain).

845 **Immunohistochemistry and RNAscope® *in situ* hybridization.** Immunohistochemistry  
846 (IHC) was performed using a Ventana BenchMark Discovery Ultra autostainer (Roche  
847 Diagnostics, Indianapolis, IN). Specific IHC assay details including antibodies, protein  
848 retrieval, sequence of multiplex assays, and incubation periods are found in Table 2  
849 SARS-CoV-2 S was semiquantitatively scored as follows: 0, no viral protein observed; 1,  
850 up to 5% positive cells per 400X field examined; 2, 5-25% positive cells per 400X field  
851 examined; and 3, up to 50% positive cells per 400X field examined.

852 For SARS-CoV-2 RNAscope® ISH, an anti-sense probe targeting the spike (S; nucleotide  
853 sequence: 21,563-25,384) of SARS-CoV-2, USA-WA1/2020 isolate (GenBank accession  
854 number MN985325.1) was used as previously described (23, 42). The RNAscope® ISH  
855 assay was performed using the RNAscope 2.5 LSx Reagent Kit (Advanced Cell  
856 Diagnostics, Newark, CA) on the automated BOND RXm platform (Leica Biosystems,  
857 Buffalo Grove, IL) as described previously (23). Briefly, four-micron sections of formalin-



858 fixed paraffin-embedded (FFPE) tissue was subjected to automated baking and  
859 deparaffinization followed by heat-induced epitope retrieval (HIER) using a ready-to-use  
860 EDTA-based solution (pH 9.0; Leica Biosystems) at 100 °C for 15 min. Subsequently,  
861 tissue sections were treated with a ready-to-use protease (RNAscope® 2.5 LSx Protease)  
862 for 15 min at 40 °C followed by a ready-to-use hydrogen peroxide solution for 10 min at  
863 room temperature. Slides were then incubated with the ready-to-use probe mixture for 2  
864 h at 40 °C, and the signal amplified using a specific set of amplifiers (AMP1 through AMP6  
865 as recommended by the manufacturer). The signal was detected using a Fast-Red  
866 solution for 10 minutes at room temperature. Slides were counterstained with a ready-  
867 to-use hematoxylin for 5 min, followed by five washes with 1X BOND Wash Solution  
868 (Leica Biosystems) for bluing. Slides were finally rinsed in deionized water, dried in a 60  
869 °C oven for 30 min, and mounted with Ecomount® (Biocare, Concord, CA, USA). A SARS-  
870 CoV-2-infected Vero E6 cell pellet was used as a positive assay control. For all assays,  
871 an uninfected mouse was used as a negative control.

872 For *hACE2* mRNA RNAscope® ISH, an anti-sense probe targeting *hACE2* (GenBank  
873 accession number NM\_021804.3; Cat. No. 848038) with no cross-reactivity to murine  
874 *Ace2* was used in a similar manner as described above with the exception that AMP5 and  
875 AMP6 were incubated for 45 min and 30 min, respectively. Murine *peptidylprolyl*  
876 *isomerase B (Ppib)* mRNA was used as a housekeeping gene to determine RNA quality  
877 and a Vero E6 cell pellet was used as a positive assay control.

878 **Multispectral microscopy.** Fluorescently labeled slides were imaged using a Mantra  
879 2.0™ or Vectra Polaris™ Quantitative Pathology Imaging System (Akoya Biosciences,  
880 Marlborough, MA). To maximize signal-to-noise ratios, images were spectrally unmixed



881 using a synthetic library specific for the Opal fluorophores used for each assay and for  
882 4',6-diamidino-2-phenylindole (DAPI). An unstained lung or brain section were used to  
883 create a tissue specific autofluorescence signature that was subsequently removed from  
884 whole-slide images using InForm software version 2.4.8 (Akoya Biosciences).

885 **Quantitative Image analysis of multiplex immunohistochemistry.** Digitized whole  
886 slide scans were analyzed using the image analysis software HALO (Indica Labs, Inc.,  
887 Corrales, NM). Slides were manually annotated to include only the brain and/or lung  
888 parenchyma depending on the panel being evaluated. Visualization threshold values  
889 were adjusted in viewer settings to reduce background signal and fine-tune visibility of  
890 markers within each sample. For the CNS panel, area quantification (AQ) was performed  
891 to determine percentages of SARS-CoV-2 Spike, Iba1 (microglia) and GFAP (astrocyte)  
892 immunoreactivity. For the lung panel, we employed the HALO Highplex (HP) module  
893 which allows for simultaneous analysis of multiple fluorescent markers within a cellular  
894 compartment. Individual cells were identified using DAPI to segment individual nuclei.  
895 Minimum cytoplasm and membrane thresholds were set for each dye to detect positive  
896 staining within a cell. Parameters were set using the real-time tuning mechanism that was  
897 tailored for each individual sample based on signal intensity. Phenotypes were  
898 determined by selecting inclusion and exclusion parameters relating to stains of interest.  
899 We used the following phenotypes: CD8+ (cytotoxic T-cells), CD20+ (B-cells), and Iba1+  
900 (macrophages). The algorithm produces a quantitative output for each cell phenotype as  
901 well as total cells per total area analyzed for an output of cells/ $\mu\text{m}^2$ . The AQ module was  
902 also used the lung panel for quantification of SARS-CoV-2-Spike immunoreactivity.

903 **Quantitative image analysis of brightfield microscopy.** Digitized whole slide scans of  
904 hematoxylin & eosin (H&E) stained k18 mouse lungs were analyzed using the Halo  
905 Tissue Classifier module. TC is a train-by-example machine learning algorithm used to  
906 identify dissimilar areas of tissue based on contextual features. For these lung samples,  
907 a classifier was created to distinguish areas of pneumonic lung from normal stroma. The  
908 classifier was run on whole lung images to determine the percentage of pneumonia.  
909 Quantitative outputs are given as total classified area (mm<sup>2</sup>), normal lung area (mm<sup>2</sup>),  
910 and pneumonia area (mm<sup>2</sup>). We divided pneumonic area by total classified area to  
911 generate a percentage of pneumonia for statistical analysis.

912 **Transmission electron microscopy.** Tissue samples were fixed for 72 hours in a  
913 mixture of 2.5% Glutaraldehyde and 2% formaldehyde in 0.1 M sodium cacodylate buffer  
914 (pH 7.4). Samples were then washed in 0.1M cacodylate buffer and postfixed with  
915 1% Osmiumtetroxide (OsO<sub>4</sub>)/1.5% Potassiumferrocyanide (KFeCN<sub>6</sub>) for 1 hour at room  
916 temperature. After washes in water and 50mM Maleate buffer pH 5.15 (MB), the samples  
917 were incubated in 1% uranyl acetate in MB for 1hr, washed in MB and water, and  
918 dehydrated in grades of alcohol (10min each; 50%, 70%, 90%, 2x10min 100%). The  
919 tissue samples were then put in propyleneoxide for 1 hr and infiltrated ON in a 1:1 mixture  
920 of propyleneoxide and TAAB Epon. The following day the samples were embedded in  
921 fresh TAAB Epon and polymerized at 60°C for 48 hrs. Semi-thin (0.5um) and ultrathin  
922 sections (50-80nm) were cut on a Reichert Ultracut-S microtome (Leica). Semi-thin  
923 sections were picked up on glass slides and stained with Toluidine blue for examination  
924 at the light microscope level to find affected areas in the tissue. Ultrathin sections from  
925 those areas were picked up onto formvar/carbon coated copper grids, stained with 0.2%

926 lead citrate and examined in a JEOL 1200EX transmission electron microscope  
927 (JOEL, Akishima, Tokyo, Japan). Images were recorded with an AMT 2k CCD camera.

928 **Statistical analysis.** Descriptive statistics and graphics as well as Kaplan-Meier  
929 (survival) curves and statistical tests were performed using GraphPad Prism v9.1.2  
930 statistical analysis software (GraphPad, San Diego, CA). Clinical parameters and  
931 quantitative pathology results were analyzed using a one-way ANOVA with Dunnett post-  
932 hoc analysis with means of groups compared to the Sham-inoculated negative controls.  
933 Viral load data were evaluated using either a one-way (serum qPCR) or two-way ANOVA  
934 (tissue qPCR and PFU data) with Tukey post hoc analysis. Significance levels were set  
935 at  $p$ -value $<0.05$  in all cases. Statistical significance on figures and supplemental figures  
936 is labelled as follow:  $*p\leq 0.05$ ,  $**p\leq 0.01$ ,  $***p\leq 0.001$ ,  $****p\leq 0.0001$ .

937

## 938 **ACKNOWLEDGEMENTS**

939 We thank the Evans Center for Interdisciplinary Biomedical Research at Boston  
940 University School of Medicine for their support of the Affinity Research Collaborative on  
941 'Respiratory Viruses: A Focus on COVID-19'. This work utilized a Ventana Discovery Ultra  
942 autostainer that was purchased with funding from a National Institutes of Health SIG grant  
943 (S10-OD026983). This work was also supported by a Boston University Start-up fund,  
944 and a Peter Paul Career Development Professorship (to F.D.), as well as by grants from  
945 the National Institutes of Health (R21 ES032882, K22 AI144050 to F.D). This study was  
946 also partially supported by start-up funds provided by the School of Veterinary Medicine,  
947 Louisiana State University to Dr. Udeni Balasuriya (PG002165) and by pilot funding to Dr.  
948 Markus Bosmann from the National Institutes of Health grant 1UL1TR001430. Drs.

949 Crossland and Carossino would like to thank our pathology mentors Drs. Fabio Del Piero  
950 and Ingeborg M. Langohr for helping instill our passion for pathology and for introducing  
951 us to each other. We are hopeful these efforts will represent the early days of a fruitful  
952 and long-lasting collaboration. We acknowledge the histology and immunohistochemistry  
953 sections at the Louisiana Animal Disease Diagnostic Laboratory for their technical  
954 assistance. The following reagent was deposited by the Centers for Disease Control and  
955 Prevention and obtained through BEI Resources, NIAID, NIH: SARS-Related  
956 Coronavirus 2, Isolate USA-WA1/2020, NR-52281. K.P.F reports that he is an employee  
957 of PerkinElmer, Inc., a manufacturer of diagnostic and analytical equipment. N.P. and  
958 A.K. declare the following competing interest as shareholders of InVivo Analytics with  
959 issued patents. T.A.K. and J.R.W. are both employees of Promega Corporation.

960

961 **AUTHOR CONTRIBUTIONS:** F. Douam, NA. Crossland, M. Carossino, U. Balasuriya  
962 and M. Bosmann designed the study; F. Douam, NA. Crossland, M. Saeed, M. Carossino,  
963 P. Montanaro, A. O'Connell, D. Kenney, H. Gertje, K Grosz, Maria Ericsson, BR Huber  
964 and S Kurnick performed the experiments; F. Douam, N. Crossland, M. Carossino, P.  
965 Montanaro, A. O'Connell, and D. Kenney performed data analysis; T. Kirkland, J Walker,  
966 K Francis, and A Klose provided resources and visualization for *in vitro* imaging; and M.  
967 Carossino, NA. Crossland, and F. Douam wrote the original draft.

968

## 969 REFERENCES

- 970 1. Andersen KG, Rambaut A, Lipkin WI, Holmes EC, Garry RF. 2020. The proximal  
971 origin of SARS-CoV-2. *Nat Med* 26:450-452.
- 972 2. Coronaviridae Study Group of the International Committee on Taxonomy of V.  
973 2020. The species Severe acute respiratory syndrome-related coronavirus:  
974 classifying 2019-nCoV and naming it SARS-CoV-2. *Nat Microbiol* 5:536-544.

- 975 3. Wang C, Horby PW, Hayden FG, Gao GF. 2020. A novel coronavirus outbreak of  
976 global health concern. *Lancet* 395:470-473.
- 977 4. Johns Hopkins University & Medicine. 2020. Coronavirus Resource Center.  
978 <https://coronavirus.jhu.edu>. Accessed
- 979 5. Goyal P, Choi JJ, Pinheiro LC, Schenck EJ, Chen R, Jabri A, Satlin MJ, Campion  
980 TR, Jr., Nahid M, Ringel JB, Hoffman KL, Alshak MN, Li HA, Wehmeyer GT, Rajan  
981 M, Reshetnyak E, Hupert N, Horn EM, Martinez FJ, Gulick RM, Safford MM. 2020.  
982 Clinical Characteristics of Covid-19 in New York City. *N Engl J Med* 382:2372-  
983 2374.
- 984 6. Tenforde MW, Kim SS, Lindsell CJ, Billig Rose E, Shapiro NI, Files DC, Gibbs KW,  
985 Erickson HL, Steingrub JS, Smithline HA, Gong MN, Aboodi MS, Exline MC,  
986 Henning DJ, Wilson JG, Khan A, Qadir N, Brown SM, Peltan ID, Rice TW, Hager  
987 DN, Ginde AA, Stubblefield WB, Patel MM, Self WH, Feldstein LR, Investigators  
988 IVYN, Team CC-R, Investigators IVYN. 2020. Symptom Duration and Risk Factors  
989 for Delayed Return to Usual Health Among Outpatients with COVID-19 in a  
990 Multistate Health Care Systems Network - United States, March-June 2020.  
991 *MMWR Morb Mortal Wkly Rep* 69:993-998.
- 992 7. Wang F, Kream RM, Stefano GB. 2020. Long-Term Respiratory and Neurological  
993 Sequelae of COVID-19. *Med Sci Monit* 26:e928996.
- 994 8. Simonnet A, Chetboun M, Poissy J, Raverdy V, Noulette J, Duhamel A, Labreuche  
995 J, Mathieu D, Pattou F, Jourdain M, Licorn, the Lille C, Obesity study g. 2020. High  
996 Prevalence of Obesity in Severe Acute Respiratory Syndrome Coronavirus-2  
997 (SARS-CoV-2) Requiring Invasive Mechanical Ventilation. *Obesity (Silver Spring)*  
998 28:1195-1199.
- 999 9. Tartof SY, Qian L, Hong V, Wei R, Nadjafi RF, Fischer H, Li Z, Shaw SF, Caparosa  
1000 SL, Nau CL, Saxena T, Rieg GK, Ackerson BK, Sharp AL, Skarbinski J, Naik TK,  
1001 Murali SB. 2020. Obesity and Mortality Among Patients Diagnosed With COVID-  
1002 19: Results From an Integrated Health Care Organization. *Ann Intern Med* In press  
1003 (<https://doi.org/10.7326/M20-3742>).
- 1004 10. Team CC-R. 2020. Preliminary Estimates of the Prevalence of Selected  
1005 Underlying Health Conditions Among Patients with Coronavirus Disease 2019 -  
1006 United States, February 12-March 28, 2020. *MMWR Morb Mortal Wkly Rep*  
1007 69:382-386.
- 1008 11. DosSantos MF, Devalle S, Aran V, Capra D, Roque NR, Coelho-Aguiar JdM,  
1009 Spohr TCLdSe, Subilhaga JG, Pereira CM, D'Andrea Meira I, Niemeyer Soares  
1010 Filho P, Moura-Neto V. 2020. Neuromechanisms of SARS-CoV-2: A Review.  
1011 *Frontiers in Neuroanatomy* 14.
- 1012 12. Eliezer M, Hamel AL, Houdart E, Herman P, Housset J, Jourdain C, Eloit C,  
1013 Verillaud B, Hautefort C. 2020. Loss of smell in patients with COVID-19: MRI data  
1014 reveal a transient edema of the olfactory clefts. *Neurology* 95:e3145-e3152.
- 1015 13. Ellul MA, Benjamin L, Singh B, Lant S, Michael BD, Easton A, Kneen R, Defres S,  
1016 Sejvar J, Solomon T. 2020. Neurological associations of COVID-19. *Lancet Neurol*  
1017 19:767-783.
- 1018 14. Lee MH, Perl DP, Nair G, Li W, Maric D, Murray H, Dodd SJ, Koretsky AP, Watts  
1019 JA, Cheung V, Masliah E, Horkayne-Szakaly I, Jones R, Stram MN, Moncur J,

- 1020 Hefti M, Folknerth RD, Nath A. 2020. Microvascular Injury in the Brains of Patients  
1021 with Covid-19. *N Engl J Med* doi:10.1056/NEJMc2033369.
- 1022 15. Liu JM, Tan BH, Wu S, Gui Y, Suo JL, Li YC. 2020. Evidence of central nervous  
1023 system infection and neuroinvasive routes, as well as neurological involvement, in  
1024 the lethality of SARS-CoV-2 infection. *J Med Virol* doi:10.1002/jmv.26570.
- 1025 16. Solomon IH, Normandin E, Bhattacharyya S, Mukerji SS, Keller K, Ali AS, Adams  
1026 G, Hornick JL, Padera RF, Sabeti P. 2020. Neuropathological Features of Covid-  
1027 19. *New England Journal of Medicine* doi:10.1056/NEJMc2019373.
- 1028 17. Walker A, Pottinger G, Scott A, Hopkins C. 2020. Anosmia and loss of smell in the  
1029 era of covid-19. *BMJ* 370:m2808.
- 1030 18. Meinhardt J, Radke J, Dittmayer C, Franz J, Thomas C, Mothes R, Laue M,  
1031 Schneider J, Brunink S, Greuel S, Lehmann M, Hassan O, Aschman T, Schumann  
1032 E, Chua RL, Conrad C, Eils R, Stenzel W, Windgassen M, Rossler L, Goebel HH,  
1033 Gelderblom HR, Martin H, Nitsche A, Schulz-Schaeffer WJ, Hakrrouch S, Winkler  
1034 MS, Tampe B, Scheibe F, Kortvelyessy P, Reinhold D, Siegmund B, Kuhl AA,  
1035 Elezkurtaj S, Horst D, Oesterhelweg L, Tsokos M, Ingold-Heppner B, Stadelmann  
1036 C, Drosten C, Corman VM, Radbruch H, Heppner FL. 2020. Olfactory  
1037 transmucosal SARS-CoV-2 invasion as a port of central nervous system entry in  
1038 individuals with COVID-19. *Nat Neurosci* doi:10.1038/s41593-020-00758-5.
- 1039 19. Song E, Zhang C, Israelow B, Lu-Culligan A, Prado AV, Skriabine S, Lu P,  
1040 Weizman OE, Liu F, Dai Y, Szigeti-Buck K, Yasumoto Y, Wang G, Castaldi C,  
1041 Heltke J, Ng E, Wheeler J, Alfajaro MM, Levavasseur E, Fontes B, Ravindra NG,  
1042 Van Dijk D, Mane S, Gunel M, Ring A, Kazmi SAJ, Zhang K, Wilen CB, Horvath  
1043 TL, Plu I, Haik S, Thomas JL, Louvi A, Farhadian SF, Huttner A, Seilhean D, Renier  
1044 N, Bilguvar K, Iwasaki A. 2021. Neuroinvasion of SARS-CoV-2 in human and  
1045 mouse brain. *J Exp Med* 218.
- 1046 20. Johansen MD, Irving A, Montagutelli X, Tate MD, Rudloff I, Nold MF, Hansbro NG,  
1047 Kim RY, Donovan C, Liu G, Faiz A, Short KR, Lyons JG, McCaughan GW, Gorrell  
1048 MD, Cole A, Moreno C, Couteur D, Hesselson D, Triccas J, Neely GG, Gamble  
1049 JR, Simpson SJ, Saunders BM, Oliver BG, Britton WJ, Wark PA, Nold-Petry CA,  
1050 Hansbro PM. 2020. Animal and translational models of SARS-CoV-2 infection and  
1051 COVID-19. *Mucosal Immunol* 13:877-891.
- 1052 21. McNamara T, Richt JA, Glickman L. 2020. A Critical Needs Assessment for  
1053 Research in Companion Animals and Livestock Following the Pandemic of  
1054 COVID-19 in Humans. *Vector Borne Zoonotic Dis* doi:10.1089/vbz.2020.2650.
- 1055 22. Munoz-Fontela C, Dowling WE, Funnell SGP, Gsell PS, Riveros-Balta AX,  
1056 Albrecht RA, Andersen H, Baric RS, Carroll MW, Cavaleri M, Qin C, Crozier I,  
1057 Dallmeier K, de Waal L, de Wit E, Delang L, Dohm E, Duprex WP, Falzarano D,  
1058 Finch CL, Frieman MB, Graham BS, Gralinski LE, Guilfoyle K, Haagmans BL,  
1059 Hamilton GA, Hartman AL, Herfst S, Kaptein SJF, Klimstra WB, Knezevic I, Krause  
1060 PR, Kuhn JH, Le Grand R, Lewis MG, Liu WC, Maisonnasse P, McElroy AK,  
1061 Munster V, Oreshkova N, Rasmussen AL, Rocha-Pereira J, Rockx B, Rodriguez  
1062 E, Rogers TF, Salguero FJ, Schotsaert M, Stittelaar KJ, Thibaut HJ, Tseng CT, et  
1063 al. 2020. Animal models for COVID-19. *Nature* 586:509-515.
- 1064 23. Gaudreault N, Trujillo J, Carossino M, Meekins D, Madden D, Balaraman V,  
1065 Henningson J, Morozov I, Bold D, Kwong T, Roman-Sosa G, Artiaga B, Indran S,



- 1066 Cool K, Garcia-Sastre A, Ma W, Wilson W, Balasuriya U, Richt J. 2020. SARS-  
1067 CoV-2 infection, disease and transmission in domestic cats. *Emerg Microbes Inf*  
1068 In press (<https://doi.org/10.1080/22221751.2020.1833687>).
- 1069 24. Imai M, Iwatsuki-Horimoto K, Hatta M, Loeber S, Halfmann PJ, Nakajima N,  
1070 Watanabe T, Ujie M, Takahashi K, Ito M, Yamada S, Fan S, Chiba S, Kuroda M,  
1071 Guan L, Takada K, Armbrust T, Balogh A, Furusawa Y, Okuda M, Ueki H,  
1072 Yasuhara A, Sakai-Tagawa Y, Lopes TJS, Kiso M, Yamayoshi S, Kinoshita N,  
1073 Ohmagari N, Hattori SI, Takeda M, Mitsuya H, Krammer F, Suzuki T, Kawaoka Y.  
1074 2020. Syrian hamsters as a small animal model for SARS-CoV-2 infection and  
1075 countermeasure development. *Proc Natl Acad Sci U S A* 117:16587-16595.
- 1076 25. Meekins DA, Morozov I, Trujillo JD, Gaudreault NN, Bold D, Carossino M, Artiaga  
1077 BL, Indran SV, Kwon T, Balaraman V, Madden DW, Feldmann H, Henningson J,  
1078 Ma W, Balasuriya UBR, Richt JA. 2020. Susceptibility of swine cells and domestic  
1079 pigs to SARS-CoV-2. *Emerg Microbes Inf* In press  
1080 (<https://doi.org/10.1080/22221751.2020.1831405>).
- 1081 26. Rockx B, Kuiken T, Herfst S, Bestebroer T, Lamers MM, Oude Munnink BB, de  
1082 Meulder D, van Amerongen G, van den Brand J, Okba NMA, Schipper D, van Run  
1083 P, Leijten L, Sikkema R, Verschoor E, Verstrepen B, Bogers W, Langermans J,  
1084 Drosten C, Fentener van Vlissingen M, Fouchier R, de Swart R, Koopmans M,  
1085 Haagmans BL. 2020. Comparative pathogenesis of COVID-19, MERS, and SARS  
1086 in a nonhuman primate model. *Science* 368:1012-1015.
- 1087 27. Shi J, Wen Z, Zhong G, Yang H, Wang C, Huang B, Liu R, He X, Shuai L, Sun Z,  
1088 Zhao Y, Liu P, Liang L, Cui P, Wang J, Zhang X, Guan Y, Tan W, Wu G, Chen H,  
1089 Bu Z. 2020. Susceptibility of ferrets, cats, dogs, and other domesticated animals  
1090 to SARS-coronavirus 2. *Science* 368:1016-1020.
- 1091 28. Shuai L, Zhong G, Yuan Q, Wen Z, Wang C, He X, Liu R, Wang J, Zhao Q, Liu Y,  
1092 Huo N, Deng J, Bai J, Wu H, Guan Y, Shi J, Tian K, Xia N, Chen H, Bu Z. 2020.  
1093 Replication, pathogenicity, and transmission of SARS-CoV-2 in minks. *National*  
1094 *Science Review* doi:10.1093/nsr/nwaa291.
- 1095 29. Sia SF, Yan LM, Chin AWH, Fung K, Choy KT, Wong AYL, Kaewpreedee P,  
1096 Perera R, Poon LLM, Nicholls JM, Peiris M, Yen HL. 2020. Pathogenesis and  
1097 transmission of SARS-CoV-2 in golden hamsters. *Nature* 583:834-838.
- 1098 30. Winkler ES, Bailey AL, Kafai NM, Nair S, McCune BT, Yu J, Fox JM, Chen RE,  
1099 Earnest JT, Keeler SP, Ritter JH, Kang LI, Dort S, Robichaud A, Head R, Holtzman  
1100 MJ, Diamond MS. 2020. SARS-CoV-2 infection of human ACE2-transgenic mice  
1101 causes severe lung inflammation and impaired function. *Nat Immunol* 21:1327-  
1102 1335.
- 1103 31. Hoffmann M, Kleine-Weber H, Schroeder S, Kruger N, Herrler T, Erichsen S,  
1104 Schiergens TS, Herrler G, Wu NH, Nitsche A, Muller MA, Drosten C, Pohlmann S.  
1105 2020. SARS-CoV-2 Cell Entry Depends on ACE2 and TMPRSS2 and Is Blocked  
1106 by a Clinically Proven Protease Inhibitor. *Cell* 181:271-280 e278.
- 1107 32. Conceicao C, Thakur N, Human S, Kelly JT, Logan L, Bialy D, Bhat S, Stevenson-  
1108 Leggett P, Zagrajek AK, Hollinghurst P, Varga M, Tsigotgi C, Tully M, Chiu C,  
1109 Moffat K, Silesian AP, Hammond JA, Maier HJ, Bickerton E, Shelton H, Dietrich I,  
1110 Graham SC, Bailey D. 2020. The SARS-CoV-2 Spike protein has a broad tropism  
1111 for mammalian ACE2 proteins. *PLoS Biol* 18:e3001016.

- 1112 33. Damas J, Hughes GM, Keough KC, Painter CA, Persky NS, Corbo M, Hiller M,  
1113 Koepfli KP, Pfenning AR, Zhao H, Genereux DP, Swofford R, Pollard KS, Ryder  
1114 OA, Nweeia MT, Lindblad-Toh K, Teeling EC, Karlsson EK, Lewin HA. 2020. Broad  
1115 host range of SARS-CoV-2 predicted by comparative and structural analysis of  
1116 ACE2 in vertebrates. *Proc Natl Acad Sci U S A* 117:22311-22322.
- 1117 34. Dinnon KH, 3rd, Leist SR, Schafer A, Edwards CE, Martinez DR, Montgomery SA,  
1118 West A, Yount BL, Jr., Hou YJ, Adams LE, Gully KL, Brown AJ, Huang E, Bryant  
1119 MD, Choong IC, Glenn JS, Gralinski LE, Sheahan TP, Baric RS. 2020. A mouse-  
1120 adapted model of SARS-CoV-2 to test COVID-19 countermeasures. *Nature In*  
1121 *press* (<https://doi.org/10.1038/s41586-020-2708-8>).
- 1122 35. Jiang RD, Liu MQ, Chen Y, Shan C, Zhou YW, Shen XR, Li Q, Zhang L, Zhu Y, Si  
1123 HR, Wang Q, Min J, Wang X, Zhang W, Li B, Zhang HJ, Baric RS, Zhou P, Yang  
1124 XL, Shi ZL. 2020. Pathogenesis of SARS-CoV-2 in Transgenic Mice Expressing  
1125 Human Angiotensin-Converting Enzyme 2. *Cell* 182:50-58 e58.
- 1126 36. McCray PB, Jr., Pewe L, Wohlford-Lenane C, Hickey M, Manzel L, Shi L, Netland  
1127 J, Jia HP, Halabi C, Sigmund CD, Meyerholz DK, Kirby P, Look DC, Perlman S.  
1128 2007. Lethal infection of K18-hACE2 mice infected with severe acute respiratory  
1129 syndrome coronavirus. *J Virol* 81:813-821.
- 1130 37. Rathnasinghe R, Strohmeier S, Amanat F, Gillespie VL, Krammer F, Garcia-Sastre  
1131 A, Coughlan L, Schotsaert M, Uccellini MB. 2020. Comparison of transgenic and  
1132 adenovirus hACE2 mouse models for SARS-CoV-2 infection. *Emerg Microbes*  
1133 *Infect* 9:2433-2445.
- 1134 38. Zheng J, Wong LR, Li K, Verma AK, Ortiz ME, Wohlford-Lenane C, Leidinger MR,  
1135 Knudson CM, Meyerholz DK, McCray PB, Jr., Perlman S. 2020. COVID-19  
1136 treatments and pathogenesis including anosmia in K18-hACE2 mice. *Nature*  
1137 doi:10.1038/s41586-020-2943-z.
- 1138 39. Li W, Moore MJ, Vasilieva N, Sui J, Wong SK, Berne MA, Somasundaran M,  
1139 Sullivan JL, Luzuriaga K, Greenough TC, Choe H, Farzan M. 2003. Angiotensin-  
1140 converting enzyme 2 is a functional receptor for the SARS coronavirus. *Nature*  
1141 426:450-454.
- 1142 40. Golden JW, Cline CR, Zeng X, Garrison AR, Carey BD, Mucker EM, White LE,  
1143 Shamblin JD, Brocato RL, Liu J, Babka AM, Rauch HB, Smith JM, Hollidge BS,  
1144 Fitzpatrick C, Badger CV, Hooper JW. 2020. Human angiotensin-converting  
1145 enzyme 2 transgenic mice infected with SARS-CoV-2 develop severe and fatal  
1146 respiratory disease. *JCI Insight* 5.
- 1147 41. Kumari P, Rothan HA, Natekar JP, Stone S, Pathak H, Strate PG, Arora K, Brinton  
1148 MA, Kumar M. 2021. Neuroinvasion and Encephalitis Following Intranasal  
1149 Inoculation of SARS-CoV-2 in K18-hACE2 Mice. *Viruses* 13.
- 1150 42. Carossino M, Ip HS, Richt JA, Shultz K, Harper K, Loynachan AT, Del Piero F,  
1151 Balasuriya UBR. 2020. Detection of SARS-CoV-2 by RNAscope((R)) in situ  
1152 hybridization and immunohistochemistry techniques. *Arch Virol* 165:2373-2377.
- 1153 43. Martines RB, Ritter JM, Matkovic E, Gary J, Bollweg BC, Bullock H, Goldsmith CS,  
1154 Silva-Flannery L, Seixas JN, Reagan-Steiner S, Uyeki T, Denison A, Bhatnagar J,  
1155 Shieh WJ, Zaki SR, Group C-PW. 2020. Pathology and Pathogenesis of SARS-  
1156 CoV-2 Associated with Fatal Coronavirus Disease, United States. *Emerg Infect*  
1157 *Dis* 26:2005-2015.



- 1158 44. Blair RV, Vaccari M, Doyle-Meyers LA, Roy CJ, Russell-Lodrigue K, Fahlberg M,  
1159 Monjure CJ, Beddingfield B, Plante KS, Plante JA, Weaver SC, Qin X, Midkiff CC,  
1160 Lehmicke G, Golden N, Threeton B, Penney T, Allers C, Barnes MB, Pattison M,  
1161 Datta PK, Maness NJ, Birnbaum A, Fischer T, Bohm RP, Rappaport J. 2020. Acute  
1162 Respiratory Distress in Aged, SARS-CoV-2-Infected African Green Monkeys but  
1163 Not Rhesus Macaques. *Am J Pathol* doi:10.1016/j.ajpath.2020.10.016.
- 1164 45. Aid M, Busman-Sahay K, Vidal SJ, Maliga Z, Bondoc S, Starke C, Terry M,  
1165 Jacobson CA, Wrijil L, Ducat S, Brook OR, Miller AD, Porto M, Pellegrini KL, Pino  
1166 M, Hoang TN, Chandrashekar A, Patel S, Stephenson K, Bosinger SE, Andersen  
1167 H, Lewis MG, Hecht JL, Sorger PK, Martinot AJ, Estes JD, Barouch DH. 2020.  
1168 Vascular Disease and Thrombosis in SARS-CoV-2-Infected Rhesus Macaques.  
1169 *Cell* 183:1354-1366 e1313.
- 1170 46. Ullah I, Prevost J, Ladinsky MS, Stone H, Lu M, Anand SP, Beaudoin-Bussieres  
1171 G, Symmes K, Benlarbi M, Ding S, Gasser R, Fink C, Chen Y, Tauzin A, Goyette  
1172 G, Bourassa C, Medjahed H, Mack M, Chung K, Wilen CB, Dekaban GA, Dikeakos  
1173 JD, Bruce EA, Kaufmann DE, Stamatatos L, McGuire AT, Richard J, Pazgier M,  
1174 Bjorkman PJ, Mothes W, Finzi A, Kumar P, Uchil PD. 2021. Live imaging of SARS-  
1175 CoV-2 infection in mice reveals neutralizing antibodies require Fc function for  
1176 optimal efficacy. *bioRxiv* doi:10.1101/2021.03.22.436337.
- 1177 47. Moreau GB, Burgess SL, Sturek JM, Donlan AN, Petri WA, Mann BJ. 2020.  
1178 Evaluation of K18-hACE2 Mice as a Model of SARS-CoV-2 Infection. *Am J Trop*  
1179 *Med Hyg* 103:1215-1219.
- 1180 48. Oladunni FS, Park J-G, Tamayo PP, Gonzalez O, Akhter A, Allué-Guardia A,  
1181 Olmo-Fontáñez A, Gautam S, Garcia-Vilanova A, Ye C, Chiem K, Headley C,  
1182 Dwivedi V, Parodi LM, Alfson KJ, Staples HM, Schami A, Garcia JI, Whigham A,  
1183 Platt RN, Gazi M, Martinez J, Chuba C, Earley S, Rodriguez OH, Mdaki SD,  
1184 Kavelish KN, Escalona R, Hallam CRA, Christie C, Patterson JL, Anderson TJC,  
1185 Carrion R, Dick EJ, Hall-Ursone S, Schlesinger LS, Kaushal D, Giavedoni LD,  
1186 Alvarez X, Turner J, Martinez-Sobrido L, Torrelles JB. 2020. Lethality of SARS-  
1187 CoV-2 infection in K18 human angiotensin converting enzyme 2 transgenic mice.  
1188 *bioRxiv* preprint (<https://doi.org/10.1101/2020.07.18.210179>).
- 1189 49. Yinda CK, Port JR, Bushmaker T, Owusu IO, Avanzato VA, Fischer RJ, Schulz JE,  
1190 Holbrook MG, Hebner MJ, Rosenke R, Thomas T, Marzi A, Best SM, de Wit E,  
1191 Shaia C, van Doremalen N, Munster VJ. 2020. K18-hACE2 mice develop  
1192 respiratory disease resembling severe COVID-19. *bioRxiv* preprint  
1193 (10.1101/2020.08.11.246314).
- 1194 50. Sun SH, Chen Q, Gu HJ, Yang G, Wang YX, Huang XY, Liu SS, Zhang NN, Li XF,  
1195 Xiong R, Guo Y, Deng YQ, Huang WJ, Liu Q, Liu QM, Shen YL, Zhou Y, Yang X,  
1196 Zhao TY, Fan CF, Zhou YS, Qin CF, Wang YC. 2020. A Mouse Model of SARS-  
1197 CoV-2 Infection and Pathogenesis. *Cell Host Microbe* 28:124-133 e124.
- 1198 51. Maiese A, Manetti AC, La Russa R, Di Paolo M, Turillazzi E, Frati P, Fineschi V.  
1199 2020. Autopsy findings in COVID-19-related deaths: a literature review. *Forensic*  
1200 *Sci Med Pathol* doi:10.1007/s12024-020-00310-8.
- 1201 52. Bryche B, St Albin A, Murri S, Lacote S, Pulido C, Ar Gouilh M, Lesellier S, Servat  
1202 A, Wasniewski M, Picard-Meyer E, Monchatre-Leroy E, Volmer R, Rampin O, Le  
1203 Goffic R, Marianneau P, Meunier N. 2020. Massive transient damage of the

- 1204 olfactory epithelium associated with infection of sustentacular cells by SARS-CoV-  
1205 2 in golden Syrian hamsters. *Brain Behav Immun* 89:579-586.
- 1206 53. Osterrieder N, Bertzbach LD, Dietert K, Abdelgawad A, Vladimirova D, Kunec D,  
1207 Hoffmann D, Beer M, Gruber AD, Trimpert J. 2020. Age-Dependent Progression  
1208 of SARS-CoV-2 Infection in Syrian Hamsters. *Viruses* 12.
- 1209 54. Rosenke K, Meade-White K, Letko M, Clancy C, Hansen F, Liu Y, Okumura A,  
1210 Tang-Huau TL, Li R, Saturday G, Feldmann F, Scott D, Wang Z, Munster V, Jarvis  
1211 MA, Feldmann H. 2020. Defining the Syrian hamster as a highly susceptible  
1212 preclinical model for SARS-CoV-2 infection. *bioRxiv*  
1213 doi:10.1101/2020.09.25.314070.
- 1214 55. Cantuti-Castelvetri L, Ojha R, Pedro LD, Djannatian M, Franz J, Kuivanen S, van  
1215 der Meer F, Kallio K, Kaya T, Anastasina M, Smura T, Levanov L, Szivovics L,  
1216 Tobi A, Kallio-Kokko H, Osterlund P, Joensuu M, Meunier FA, Butcher SJ, Winkler  
1217 MS, Mollenhauer B, Helenius A, Gokce O, Teesalu T, Hepojoki J, Vapalahti O,  
1218 Stadelmann C, Balistreri G, Simons M. 2020. Neuropilin-1 facilitates SARS-CoV-2  
1219 cell entry and infectivity. *Science* 370:856-860.
- 1220 56. Hysenaj L, Little S, Kulhanek K, Gbenedio OM, Rodriguez L, Shen A, Lone JC,  
1221 Lupin-Jimenez LC, Bonser LR, Serwas NK, Bahl K, Mick E, Li JZ, Ding VW,  
1222 Matsumoto S, Maishan M, Simoneau C, Fragiadakis G, Jablons DM, Langelier CR,  
1223 Matthay M, Ott M, Krummel M, Combes AJ, Sil A, Erle DJ, Kratz JR, Roose JP.  
1224 2021. SARS-CoV-2 infection studies in lung organoids identify TSPAN8 as novel  
1225 mediator. *bioRxiv* doi:10.1101/2021.06.01.446640.
- 1226 57. Chen M, Shen W, Rowan NR, Kulaga H, Hillel A, Ramanathan M, Jr., Lane AP.  
1227 2020. Elevated ACE-2 expression in the olfactory neuroepithelium: implications for  
1228 anosmia and upper respiratory SARS-CoV-2 entry and replication. *Eur Respir J*  
1229 56.
- 1230 58. Chen RE, Winkler ES, Case JB, Aziati ID, Bricker TL, Joshi A, Darling TL, Ying B,  
1231 Errico JM, Shrihari S, VanBlargan LA, Xie X, Gilchuk P, Zost SJ, Droit L, Liu Z,  
1232 Stumpf S, Wang D, Handley SA, Stine WB, Jr., Shi PY, Davis-Gardner ME, Suthar  
1233 MS, Knight MG, Andino R, Chiu CY, Ellebedy AH, Fremont DH, Whelan SPJ,  
1234 Crowe JE, Jr., Purcell L, Corti D, Boon ACM, Diamond MS. 2021. In vivo  
1235 monoclonal antibody efficacy against SARS-CoV-2 variant strains. *Nature*  
1236 doi:10.1038/s41586-021-03720-y.
- 1237 59. Shapira T, Monreal IA, Dion SP, Jager M, Desilets A, Olmstead AD, Vandal T,  
1238 Buchholz DW, Imbiakha B, Gao G, Chin A, Rees WD, Steiner T, Nabi IR, Marsault  
1239 E, Sahler J, August A, Van de Walle G, Whittaker GR, Boudreault PL, Aguilar HC,  
1240 Leduc R, Jean F. 2021. A novel highly potent inhibitor of TMPRSS2-like proteases  
1241 blocks SARS-CoV-2 variants of concern and is broadly protective against infection  
1242 and mortality in mice. *bioRxiv* doi:10.1101/2021.05.03.442520.
- 1243 60. White KM, Rosales R, Yildiz S, Kehrer T, Miorin L, Moreno E, Jangra S, Uccellini  
1244 MB, Rathnasinghe R, Coughlan L, Martinez-Romero C, Batra J, Rojc A,  
1245 Bouhaddou M, Fabius JM, Obernier K, Dejosez M, Guillen MJ, Losada A, Aviles  
1246 P, Schotsaert M, Zwaka T, Vignuzzi M, Shokat KM, Krogan NJ, Garcia-Sastre A.  
1247 2021. Plitidepsin has potent preclinical efficacy against SARS-CoV-2 by targeting  
1248 the host protein eEF1A. *Science* 371:926-931.

- 1249 61. Xie X, Muruato AE, Zhang X, Lokugamage KG, Fontes-Garfias CR, Zou J, Liu J,  
1250 Ren P, Balakrishnan M, Cihlar T, Tseng CK, Makino S, Menachery VD, Bilello JP,  
1251 Shi PY. 2020. A nanoluciferase SARS-CoV-2 for rapid neutralization testing and  
1252 screening of anti-infective drugs for COVID-19. *Nat Commun* 11:5214.
- 1253 62. Corman VM, Landt O, Kaiser M, Molenkamp R, Meijer A, Chu DK, Bleicker T,  
1254 Brunink S, Schneider J, Schmidt ML, Mulders DG, Haagmans BL, van der Veer B,  
1255 van den Brink S, Wijsman L, Goderski G, Romette JL, Ellis J, Zambon M, Peiris  
1256 M, Goossens H, Reusken C, Koopmans MP, Drosten C. 2020. Detection of 2019  
1257 novel coronavirus (2019-nCoV) by real-time RT-PCR. *Euro Surveill* 25.

1258

## 1259 FIG. LEGENDS

1260 **Fig. 1. SARS-CoV-2 caused lethal disease in K18-hACE2 mice.** K18-hACE2 mice  
1261 (n=35) were inoculated intranasally with  $1 \times 10^6$  plaque forming units (PFU). Body weight  
1262 (A), clinical signs (B), temperature (C), and survival (D) were monitored daily in sham/PBS  
1263 animals (black, up to 7 dpi) and in infected animals (male, red; female, blue; up to 14 dpi).  
1264 Animals meeting euthanasia criteria were counted dead the following day. Viral loads  
1265 (genome copy numbers/mg) or infectious virus particles (PFU/mg of tissue) were  
1266 monitored in the lung and brain (E-F). RNA copies were also examined in the serum  
1267 (genome copies/mL) either directly on serum (G) or via a re-infectivity assay (H) using  
1268 Vero E6 cells. The limit of detection is shown with a dashed line. n=3 (sham/PBS, n=19  
1269 (male), n=16 (female). One-way or two-way ANOVA. \* $p \leq 0.05$ , \*\* $p \leq 0.01$ , \*\*\* $p \leq 0.001$ ,  
1270 \*\*\*\* $p \leq 0.0001$ . For A-D, blue and green asterisks compare sham group vs. male group,  
1271 and sham group vs. female group respectively. NA, non-applicable statistical test due  
1272 extensive animal death at 6 dpi and limited n at 7 dpi.

1273 **Fig. 2. Temporal analysis of SARS-CoV-2 infection in the nasal cavity of K18-hACE2**  
1274 **mice.** Histological changes, and viral protein (brown) and RNA (red) distribution and  
1275 abundance were assessed in non-infected (mock: A, D, G, J) and infected mice at 2 (B,

1276 E, H ,K) and 4 (C, F, I, L) days following intranasal inoculation. At 2 dpi, suppurative  
1277 rhinitis in the rostral and intermediate turbinates (B, arrow) correlated with abundant  
1278 intraepithelial SARS-CoV-2 protein (E) and RNA (E, inset). Abundant viral protein and  
1279 RNA were detected in the olfactory neuroepithelium (ONE, K and inset) in the absence  
1280 of histologic lesions (H). At 4 dpi, only sporadically infected cells were noted in the  
1281 epithelium lining the nasal turbinates and ONE (F and L, arrow and insets) in the absence  
1282 of histologic lesions (C and I). Mock-infected are depicted in A, D, G and J. H&E and Fast  
1283 Red (viral RNA), 200X total magnification. Bar = 100  $\mu$ m.

1284 **Fig. 3. Temporal analysis of SARS-CoV-2 infection in the lungs of K18-hACE2 mice.**

1285 Lung tissues from non-infected mice (Mock: A, B) and from infected mice at 2 (C, D), 4  
1286 (E, F), 7 (G, H) and 14 (I, J) days following intranasal inoculation were analyzed. Subgross  
1287 histological images of the lungs and corresponding pneumonia classifiers for each  
1288 timepoint are depicted in panel K (green = normal; yellow = pneumonia). Mild to moderate  
1289 interstitial pneumonia was evident starting at 2 dpi with frequently reactive blood vessels  
1290 (D, arrow). At 7 dpi, alveolar type 2 (AT2) cell hyperplasia was observed (H, arrows).  
1291 Residual mild pneumonia was observed in the rare animals that survived to 14 dpi, with  
1292 rare sporadic lymphoid aggregates (J-arrows). H&E, 50X (A, C, E, G, and I; bar = 500  
1293  $\mu$ m), 200X (B, D, F, H and J; bar = 100  $\mu$ m) and 1X (K) total magnification. One-way  
1294 ANOVA; ns, non-significant.

1295 **Fig. 4. Temporal analysis of SARS-CoV-2 RNA and protein distribution in the lungs**

1296 **of K18-hACE2 mice.** Presence of viral RNA (A-E) and Spike protein (F-J) was assessed  
1297 by ISH and IHC in non-infected (mock: A, F) and infected lung tissues from K18-hACE2  
1298 mice at 2 (B, G), 4 (C, H), 7 (D, I) and 14 (E, J) days following intranasal inoculation.

1299 Peak viral RNA and protein occurred at 4 dpi (C,H), with an evident decline by 7 dpi (D,  
1300 I). No viral RNA or protein were detected at 14 dpi (E, J). Fast Red, viral RNA (A-E) and  
1301 DAB viral protein (F-J), 100X total magnification. Bar = 200  $\mu$ m. Insets (I&J), 400x total  
1302 magnification.

1303 **Fig. 5. SARS-CoV-2 tropism following intranasal inoculation in K18-hACE2.** (A-C)

1304 At 4 dpi, SARS-CoV-2 (yellow) showed tropism for RAGE<sup>+</sup> alveolar type 1 (AT1, magenta)  
1305 and scattered SPC<sup>+</sup> alveolar type 2 (AT2, red) cells (B and C, arrowheads, and arrows,  
1306 respectively) but not for CD31<sup>+</sup> endothelial cells. B and C represent magnification of inset  
1307 1 and 2 from A, respectively. (D-F) 6 dpi, virus particles (VPs) were bound by double  
1308 membrane vesicles (DMVs) in AT1 (E) and AT2 (F) cells. AT1 contained abundant  
1309 caveolae. Another unique feature observed in AT1 cells was the presence of cubic  
1310 membranes (CM). AT2 pneumocytes were characterized by presence of lamellar bodies.  
1311 E and F represent magnification of inset 1 and 2 from D, respectively. (G, H) Viral particles  
1312 were not identified in ciliated or non-ciliated club bronchiolar epithelium. H represents an  
1313 inset magnification of G. Multiplex fluorescent IHC, 100x (A; bar= 100  $\mu$ m) and 200x (B,C;  
1314 bar = 50  $\mu$ m) total magnification. TEM, bar = 2  $\mu$ m (B), 100 nm (B1, B2 and C1), and 3  
1315  $\mu$ m (C). A, alveolar lumen; BM, basement membrane; C, capillary; Cav, caveolae; Ci,  
1316 ciliated epithelium; Cl, club epithelium; CM, cubic membranes; DMVs, double-membrane  
1317 vesicles; END, endothelium; J; cell-cell junction; VPs, viral particles.

1318 **Fig. 6. Temporal immunoprofiling of the pulmonary host inflammatory response to**

1319 **SARS-CoV-2.** (A-H) Quantification and 4-plex fluorescent IHC targeting SARS-CoV-2

1320 Spike (A, E-H), and macrophage Iba-1<sup>+</sup> (B, E-H), CD8<sup>+</sup> (C, E-H) and CD19<sup>+</sup> cell (D, E-  
1321 H) infiltration in the lung of sham/PBS mice and in inoculated mice (2, 4, 7 and 14 dpi). In

1322 inoculated mice, SARS-CoV-2 Spike peaked between 4-7 dpi (A, F-G). Iba-1+  
1323 macrophages (red) increased significantly peaking at 7 dpi (B, G), along with a lower  
1324 infiltration of CD8+ T lymphocytes-magenta that peaked between 4-7 dpi (C,F-G) while  
1325 Sham/PBS mice had low residual inflammatory cells (E). CD19+ B cells arranged in  
1326 clusters were only evident in the two survivors euthanized at 14 dpi (D, H). Insets depict  
1327 immune cell phenotyping outputs that were applied across the entire whole slide.  
1328 Multiplex fluorescent IHC (E-H): 100X and 400X (insets) total magnification, bar=50µm.  
1329 I. Neutralizing activity of serum isolated from a naïve/non-infected K18-hACE2 (purple)  
1330 and from the two 14 dpi survivors at 14 dpi (survivor 1 and 2, red and black respectively).  
1331 An anti-SARS-CoV-2 Spike RBD antibody (anti-RBD, blue) was used as a positive  
1332 control. Serum was serially diluted by 2-fold. One-way ANOVA. \*\* $p \leq 0.01$ .

1333 **Fig. 7. Temporal neuronal damage in K18-hACE2 mice following intranasal**  
1334 **inoculation with SARS-CoV-2.** Histologic changes in the cerebrum (A, D, G, J, M) or  
1335 olfactory bulb (B, E, H, K, N) in non-infected or infected K18-hACE2 mice. SARS-CoV-2  
1336 Spike protein was also probed in the olfactory bulb of non-infected and infected K18-  
1337 hACE2 mice by IHC (C, F, I, L, O). SARS-CoV-2 protein (brown) was evident as early as  
1338 4 dpi (I, arrow), but no histologic changes were noted until 7 dpi (J-K). At that time point,  
1339 mild (J, arrowheads) to marked (J, inset) spongiosis with neuronal degeneration and  
1340 necrosis involving multiple areas within the cerebral cortex and elsewhere were observed.  
1341 Similar changes were evident in the olfactory bulb, with occasional perivascular  
1342 cuffs/gliosis (K, arrowhead) and abundant viral protein (L, arrows). No histologic  
1343 alterations or viral protein were detected in survivor mice euthanized at 14 dpi (M-O).



1344 H&E and DAB (viral protein), 100X (A, B, D, E, G, H, J, K, M, N; bar = 200  $\mu$ m) and 200X  
1345 (C, F, I, L, O; bar = 100  $\mu$ m) total magnification.

1346 **Fig. 8. Invasion of SARS-CoV-2 into the central nervous system.** (A) Sagittal sections  
1347 of the head of non-infected (mock, top panel) and infected (4 and 7 dpi, middle and bottom  
1348 panel respectively) were analyzed for viral protein and RNA distribution. At 4 dpi (middle  
1349 panel), SARS-CoV-2 infected neurons within the mitral layer of the olfactory bulb (1,  
1350 arrow) as well as small clusters of neuronal bodies within the cerebral cortex (2, SARS-  
1351 CoV-2 RNA in inset). At 7 dpi (bottom panel), SARS-CoV-2 protein was widespread along  
1352 the mitral layer of the olfactory bulb (1) and throughout the central nervous system (2,  
1353 SARS-CoV-2 RNA in inset) with exception of the cerebellum. EPL, external plexiform  
1354 layer; GCL, granular cell layer; GL, glomerular layer; ML, mitral layer. DAB (viral protein)  
1355 and Fast Red (viral RNA). 7.5X (bar = 2.5 mm) and 200X (bar = 100  $\mu$ m) total  
1356 magnification. On the right of each panel, pictures labelled 1 and 2 are 266X total  
1357 magnification insets represented by the hashed squares labeled in the lower (7.5X)  
1358 magnification images. (B) Representative three-dimensional profile view (right side) of a  
1359 K18-hACE2 mouse following inoculation with a rSARS-CoV-2 NL virus ( $10^6$  PFU).  
1360 NanoLuc bioluminescent signal was detected and quantified at 6 dpi following  
1361 fluorofurimazine injection (Sub-cutaneous) using the InVivoPLOT (InVivoAx) system and  
1362 an IVIS Spectrum (PerkinElmer) optical imaging instrument. Location of the lungs and  
1363 brain are indicated.

1364 **Fig. 9. SARS-CoV-2 replication and assembly of virus particles in hippocampal**  
1365 **neurons and glial response.** (A-C) Quantification (A) of 3-plex fluorescent IHC (B,C)  
1366 targeting SARS-CoV-2 Spike, astrocyte (GFAP) and Iba-1+ microglial infiltration in the

1367 brain of sham/PBS mice and in inoculated mice (2, 4, 7 and 14 dpi). The amount of viral  
1368 protein rapidly and markedly increases by 7 dpi, along with an intense astrocytic and  
1369 microglial response. (D-E) Ultrastructural examination of infected neighboring  
1370 hippocampal neurons illustrated cytoplasmic swelling by numerous double membrane  
1371 bound vesicles (DMVs) and free virus particles. Karyolysis and global electron dense  
1372 transformation of the cytoplasmic compartment was also observed indicative of neuronal  
1373 necrosis (NN). E is an inset magnification from D. Multiplex IHC, 200X total magnification,  
1374 bar = 100  $\mu$ m. TEM, bar = 100 nm (D) or 50nm (E). One-way ANOVA; \* $p \leq 0.05$ .

1375 **Fig. 10. Histological and immunohistochemical findings in the cervicothoracic**  
1376 **spinal cord of SARS-CoV-2-infected K18-hACE2 mice at 7 dpi.** (A) At 7 dpi, multifocal  
1377 neuronal bodies within the grey matter are shrunken, angular and hyperchromatic  
1378 (neuronal degeneration and necrosis), and the neuroparenchyma has multiple clear  
1379 spaces filled with small amounts of debris (spongiosis) with a slight increase in the  
1380 number of glial cells (gliosis). H&E, 100X total magnification. (B) Abundant SARS-CoV-2  
1381 spike protein localized within the perikaryon and processes of neurons within the spinal  
1382 cord. DAB, 200X total magnification. Bar = 100  $\mu$ m. (C) No myelin loss was noted in the  
1383 white matter. Luxol Fast Blue, 200X total magnification. Bar = 100  $\mu$ m.

1384 **Fig. 11. Distribution of ACE2 in lungs, nasal cavity, brain, and olfactory bulb of wild-**  
1385 **type C57BL/6J and transgenic K18-hACE2 mice.** Lung (A-C), nasal  
1386 (rostral/intermediate turbinates [R/I]) and olfactory epithelium (ONE) (D-F), olfactory bulb  
1387 (G-I) and brain (J-L) from non-infected C57BL/6J, and from non-infected and infected (7  
1388 dpi). K18-hACE2 mice were analyzed via immunohistochemistry using a cross-reactive  
1389 anti-ACE2 antibody. In the lungs (A-C), ACE2 expression (brown) was mostly restricted



1390 to the apical membrane of bronchiolar epithelial cells with scattered positive AT2 cells  
1391 (inset arrows). Nasal (rostral/intermediate turbinates [R/I]) and olfactory epithelium (ONE)  
1392 were devoid of ACE2 in C57BL/6J mice (D) but expression was enhanced in K18-hACE2  
1393 mice with intense apical expression (E and F). ACE2 expression within the olfactory bulb  
1394 (G-I) and the brain (J-L) was restricted to capillary endothelium with no neuronal  
1395 expression. DAB, 200X total magnification. Bar = 100  $\mu$ m.

1396 **Fig. 12. Expression and distribution of *hACE2* mRNA in the brain and lungs of**  
1397 **C57BL/6J and K18-hACE2 transgenic mice via RNAscope® ISH.** (A-C) *hACE2* lung  
1398 expression. While no expression of *hACE2* was noted in the lungs of wild-type C57BL/6J  
1399 mice (A), *hACE2* was expressed in the bronchiolar epithelium (arrowheads) and sporadic  
1400 AT2 cells (arrows) in transgenic K18-hACE2 mice (B and C), which correlated with  
1401 immunohistochemical findings. (D-F) *hACE2* brain expression. *hACE2* was not  
1402 expressed in the Cerebrum of C57BL/6J mice (D) but in clusters of neurons within the  
1403 cerebrum (E) and hippocampus (F). Fast Red, 400X total magnification. Bar = 50  $\mu$ m.

1404 **Fig. 13. Expression of ACE2 in the gastrointestinal tract.** Immunohistochemistry was  
1405 performed using a cross-reactive anti-ACE2 antibody in the stomach (A-C), small  
1406 intestine (D-F) and colon (G-I). In the stomach, ACE2 expression (red) was intense in the  
1407 non-glandular mucosa and capillaries of the glandular mucosa (A-C, arrows). Enterocytes  
1408 lining the small intestine of C57BL/6J and K18-hACE2 mice displayed prominent apical  
1409 cytoplasmic ACE2 expression (D-F). In the colon, scattered enterocytes expressed ACE2  
1410 (G-I, arrows). Fast Red, 100X (A-C; bar = 200  $\mu$ m) and 200X (D-I; bar = 100  $\mu$ m) total  
1411 magnification.

1412

1413

1414 **Table 1.** SARS-CoV-2 viral protein abundance in tissues derived from SARS-CoV-2-infected K18-hACE2 mice. Median  
 1415 scores are represented along with ranges between brackets when applicable.

| DPI  | AT1/AT2 | Bronchioles | Rostral turbinates | Intermediate turbinates | ONE     | Olf. bulb | Brain   | Spinal cord (CT) | Spinal cord (LS) | GI* | Kidneys |
|------|---------|-------------|--------------------|-------------------------|---------|-----------|---------|------------------|------------------|-----|---------|
| Mock | 0       | 0           | 0                  | 0                       | 0       | 0         | 0       | 0                | 0                | 0   | 0       |
| 2    | 2 (1-2) | 0           | 1 (0-2)            | 2 (1-2)                 | 1 (1-2) | 0         | 0       | 0                | 0                | 0   | 0       |
| 4    | 2 (1-3) | 0           | 0 (0-1)            | 0 (0-1)                 | 1 (0-1) | 0 (0-1)   | 0 (0-1) | 0                | 0                | 0   | 0       |
| 6-8  | 2 (1-3) | 0           | 0                  | 0                       | 1 (0-1) | 1 (0-2)   | 3 (0-3) | 1 (0-2)          | 0 (0-1)          | 0   | 0       |
| 14   | 0       | 0           | 0                  | 0                       | 0       | 0         | 0       | 0                | 0                | 0   | 0       |

1416 0, no SARS-CoV-2 protein observed; 1, 0 to 5% of cells within a high magnification (400X) field are positive for viral  
 1417 protein; 2, 5 to 25% of cells within a high magnification (400X) field are positive for viral protein; 3, >25 to <50% of cells  
 1418 within a high magnification (400X) field are positive for viral protein. NA, not available. AT1, alveolar type 1 pneumocytes;  
 1419 AT2, alveolar type 2 pneumocytes; ONE, olfactory neuroepithelium; CT, cervicothoracic segment; LS, lumbosacral  
 1420 segment; GI, gastrointestinal tract.

1421 \*Sections examined included stomach, small intestine (duodenum, jejunum, and ileum) and large intestine (cecum and  
 1422 colon).

1423

1424 **Table 2.** Clinical scoring system used for clinical monitoring of SARS-CoV-2-infected K18-hACE2 mice.

| <b>Category</b>  | <b>Score = Criteria</b>              |
|------------------|--------------------------------------|
| Body weight      | 1 = 10-19% loss                      |
| Respiration      | 1 = rapid, shallow, increased effort |
| Appearance       | 1 = ruffled fur, hunched posture     |
| Responsiveness   | 1 = low to moderate unresponsiveness |
| Neurologic signs | 1 = tremors                          |

1425

1426

1427

1428 **Table 3.** Antibodies and antigen retrieval conditions for the assays performed in this study.

|         | Sequence | Antigen Target                         | Species Origin | Clone      | Manufacturer              | Catalog               | Primary Antibody Dilution | Antigen Retrieval (Ventana) | Chromogen or Fluorophore |
|---------|----------|----------------------------------------|----------------|------------|---------------------------|-----------------------|---------------------------|-----------------------------|--------------------------|
| Assay 1 | NA       | SARS-CoV-2 Spike (S)                   | Mouse          | E7U6O      | Cell Signaling Technology | Pre-commercialization | 1:1000                    | CC1 (Tris)                  | DAB                      |
| Assay 2 | NA       | Angiotensin converting enzyme 2 (ACE2) | Rabbit         | EPR34435   | Abcam                     | ab108252              | 1:200                     | CC1 (Tris)                  | Discovery Red and DAB    |
| Assay 3 | 1        | SARS-CoV-2 S                           | Mouse          | E7U6O      | Cell Signaling Technology | Pre-commercialization | 1:1000                    | CC1 (Tris)                  | Opal 480                 |
|         | 2        | Iba-1                                  | Rabbit         | Polyclonal | WAKO                      | 019-19741             | 1:2000                    | CC2 (Citrate)               | Opal 570                 |
|         | 3        | GFAP                                   | Rabbit         | Polyclonal | DAKO                      | Z0334                 | 1:500                     | CC1 (Tris)                  | Opal 690                 |
| Assay 4 | 1        | CD8                                    | Rabbit         | D4W2Z      | Cell Signaling Technology | 98941                 | 1:200                     | CC1 (Tris)                  | Opal 620                 |
|         | 2        | SARS-CoV-2 S                           | Mouse          | E7U6O      | Cell Signaling Technology | Pre-commercialization | 1:1000                    | CC1 (Tris)                  | Opal 570                 |
|         | 3        | CD19                                   | Rabbit         | D4V4B      | Cell Signaling Technology | 90176                 | 1:600                     | CC2 (Citrate)               | Opal 520                 |
|         | 4        | Iba-1                                  | Rabbit         | Polyclonal | WAKO                      | 019-19741             | 1:2000                    | CC2 (Citrate)               | Opal 690                 |
| Assay 5 | 1        | RAGE                                   | Rat            | EPR21171   | R&D                       | MAB1179q-100          | 1:50                      | CC1 (Tris)                  | Opal 480                 |
|         | 2        | SARS-CoV N                             | Rabbit         | Polyclonal | Novus biologicals         | NB100-56576           | 1:200                     | CC1 (Tris)                  | Opal 570                 |
|         | 3        | Prosurfactant C Protein                | Rabbit         | Polyclonal | Seven Hills Bioreagents   | WRAB-9337             | 1:800                     | CC2 (Citrate)               | Opal 690                 |
|         | 4        | CD31                                   | Rabbit         | D8V9E      | Cell Signaling Technology | 77699S                | 1:100                     | CC2 (Citrate)               | Opal 520                 |

1429

1430

1431

# Figure 1

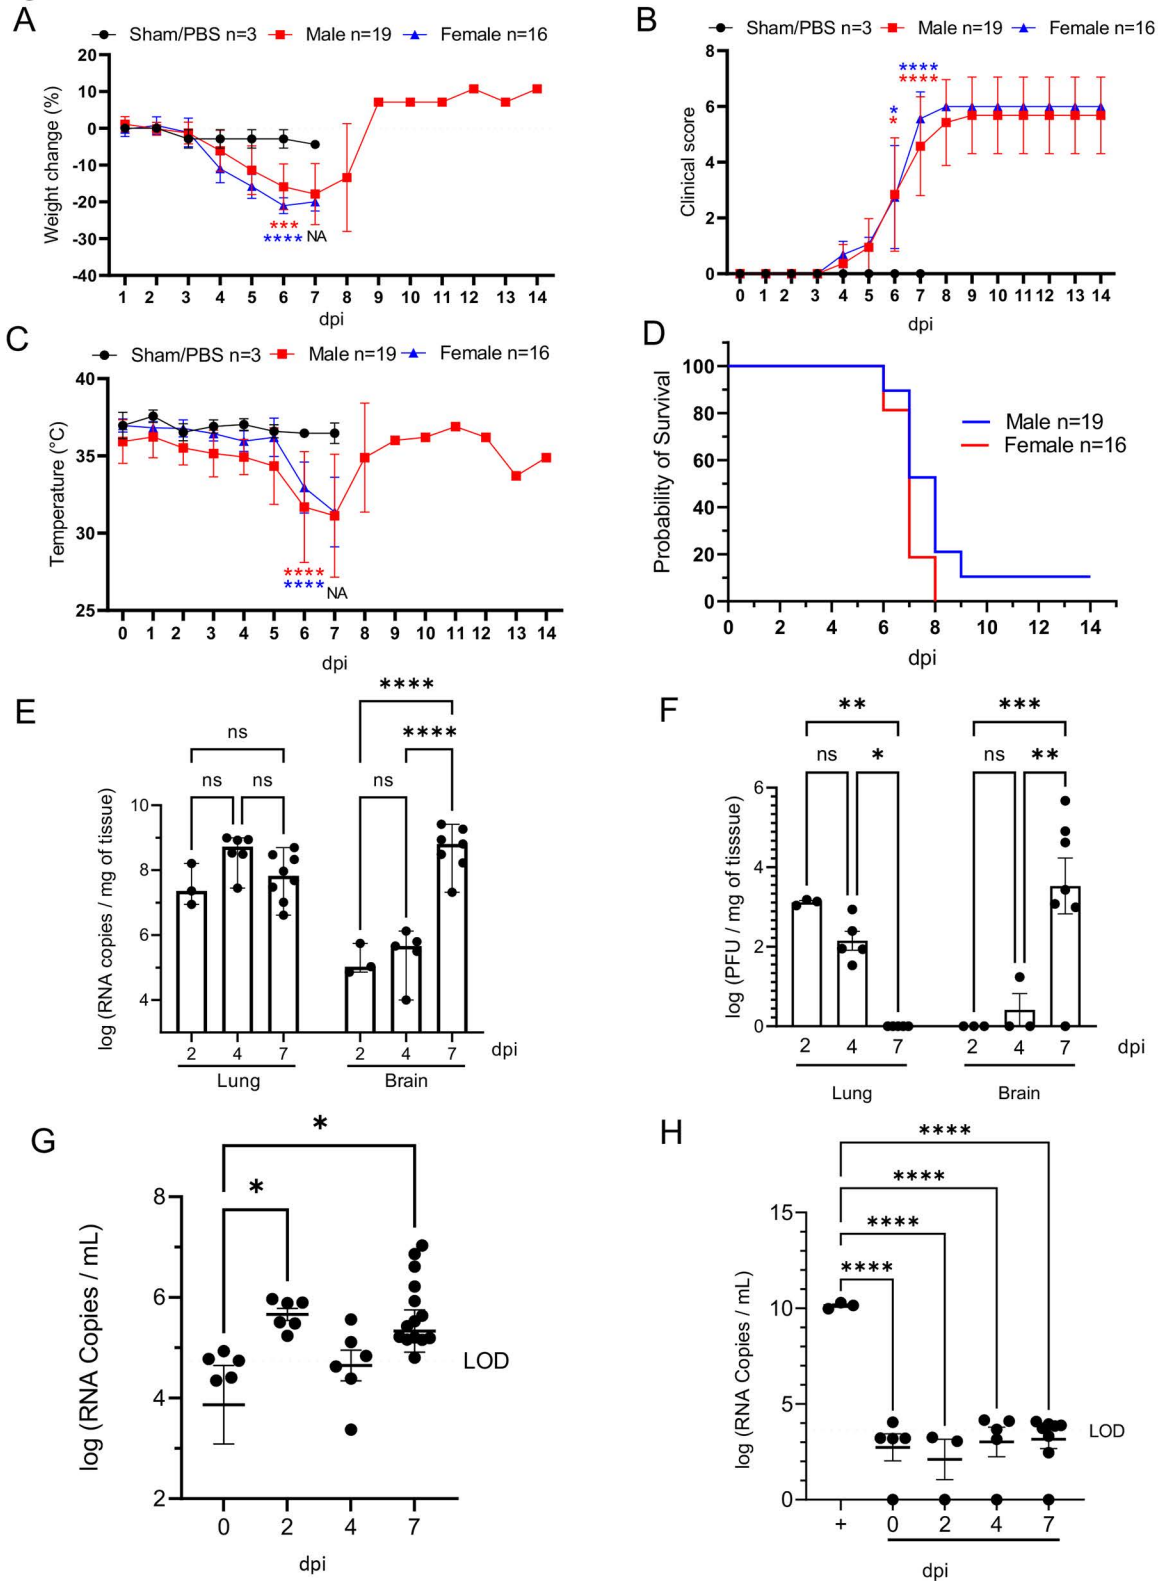

**Figure 2**

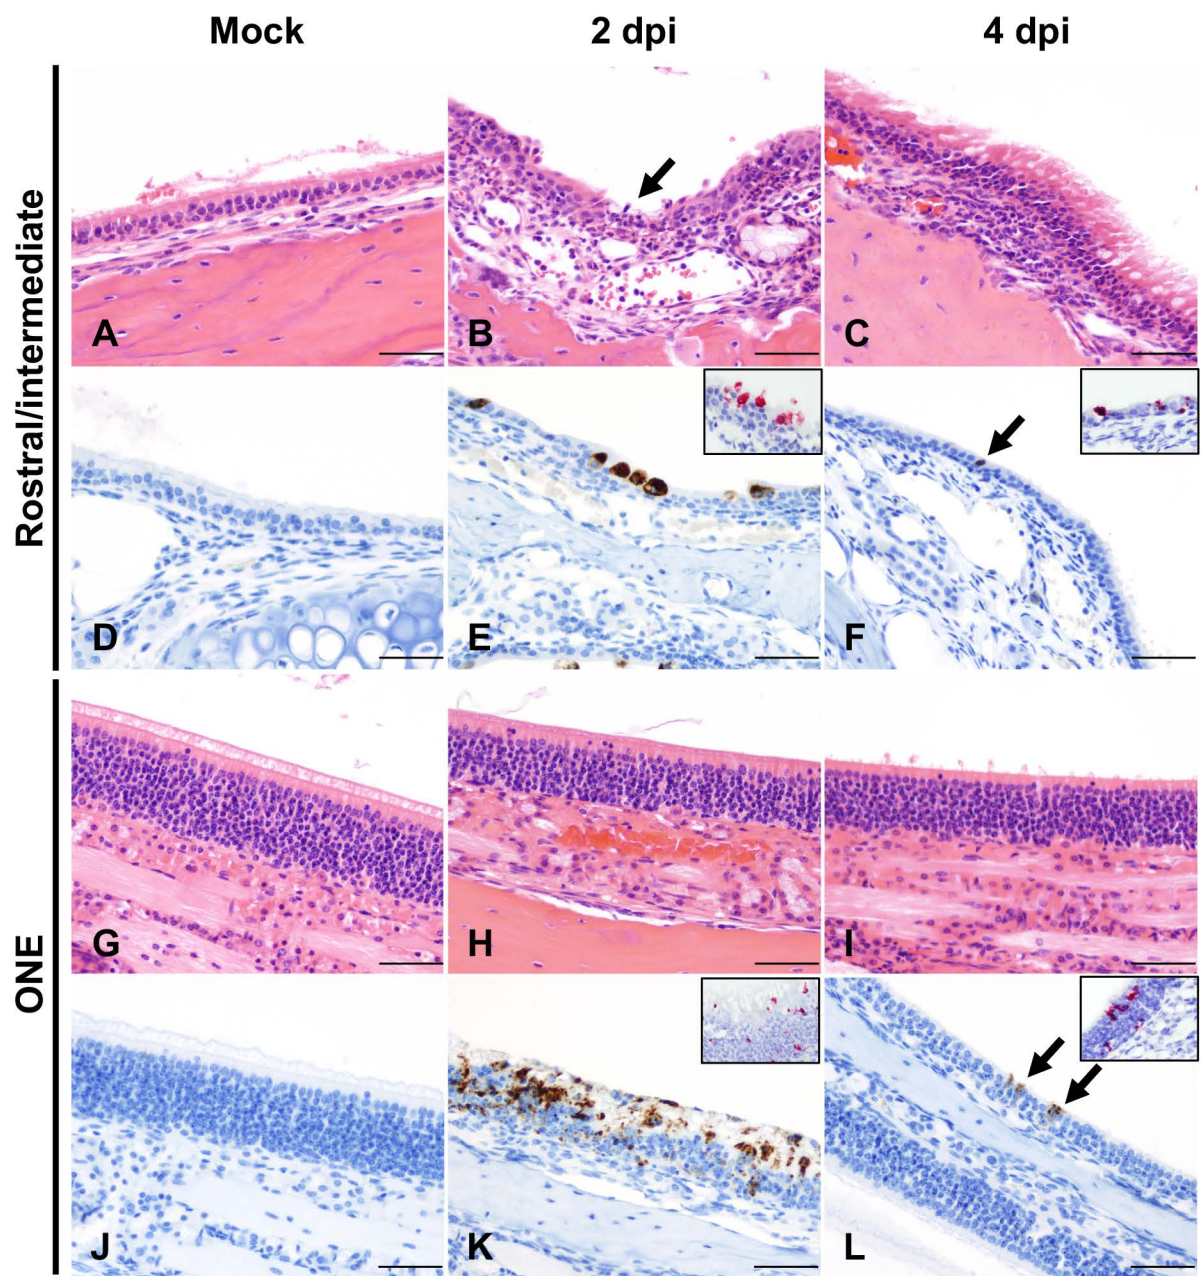



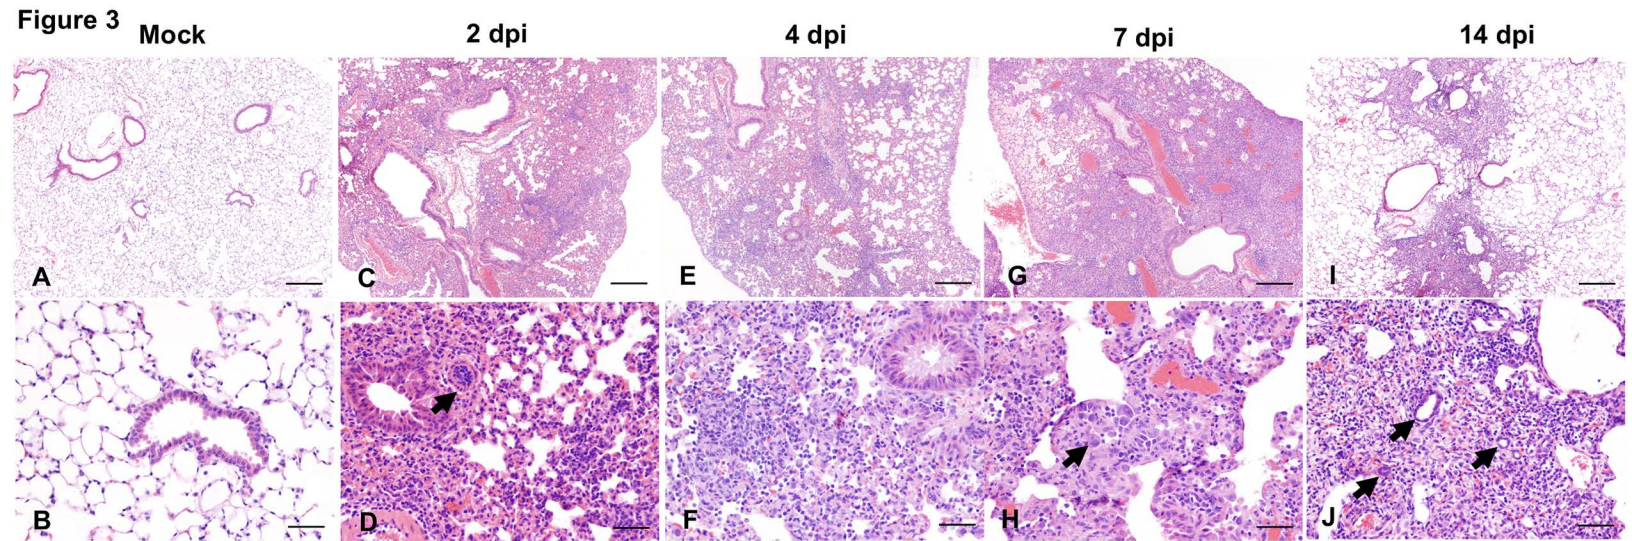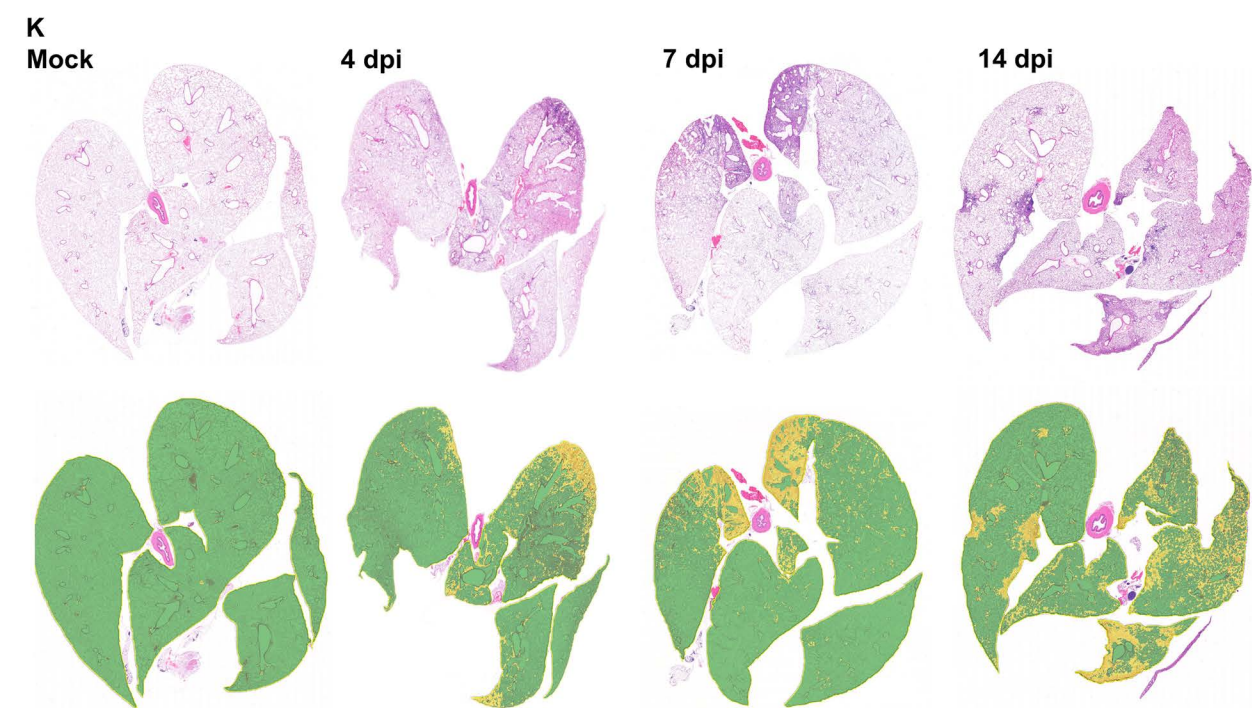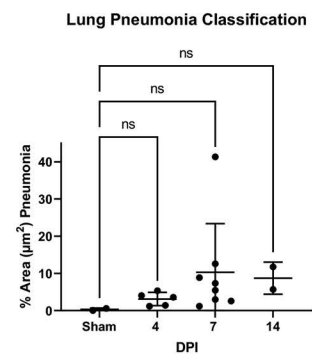

**Figure 4**

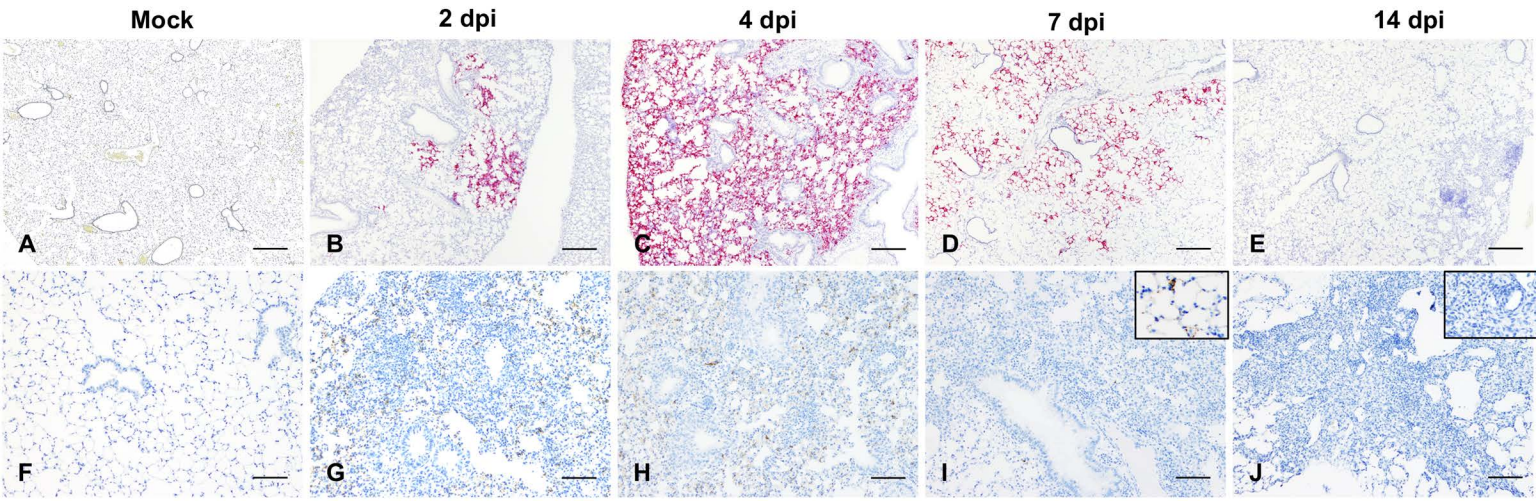



**Figure 5**

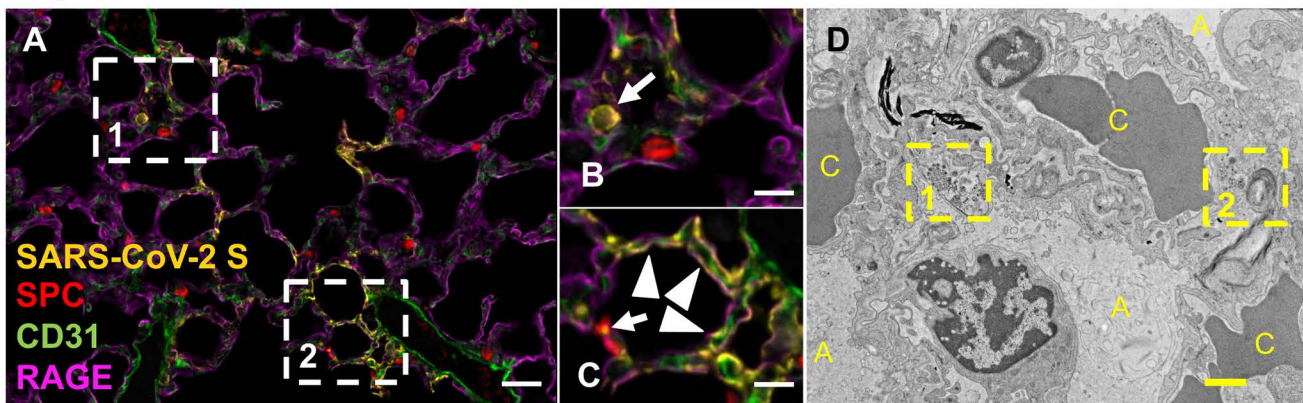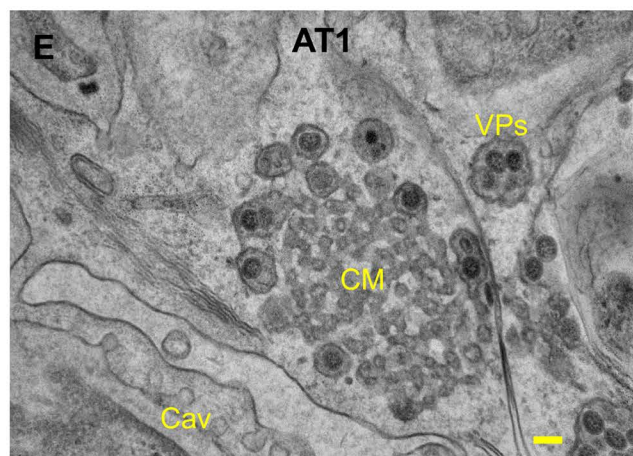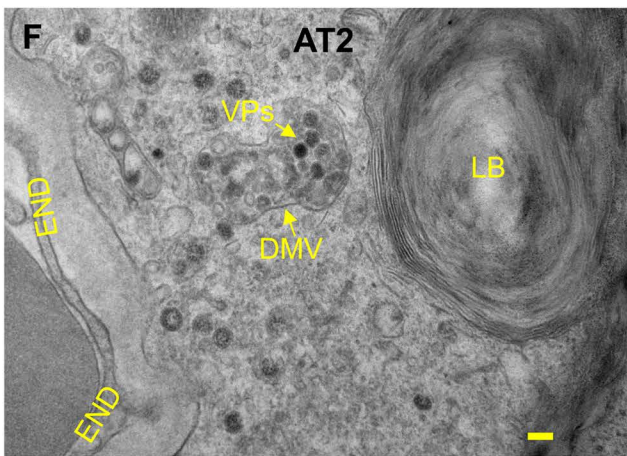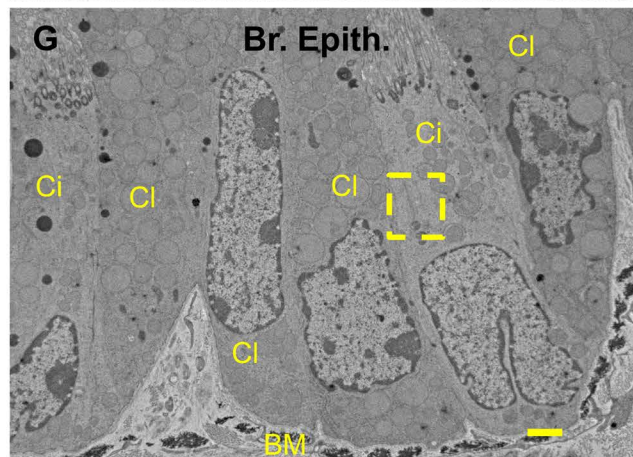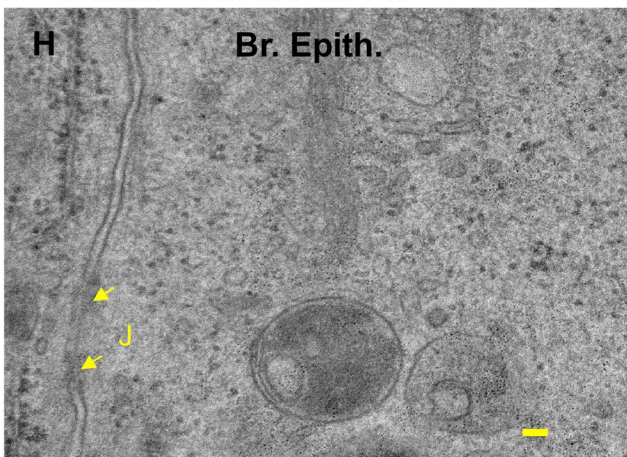



**Figure 6**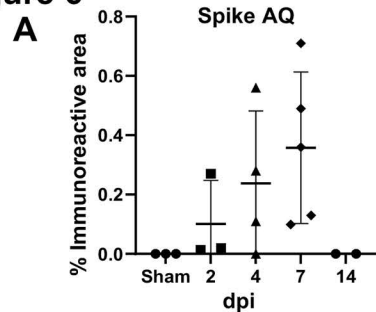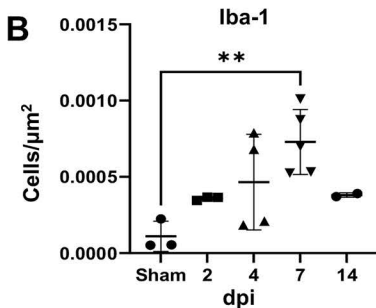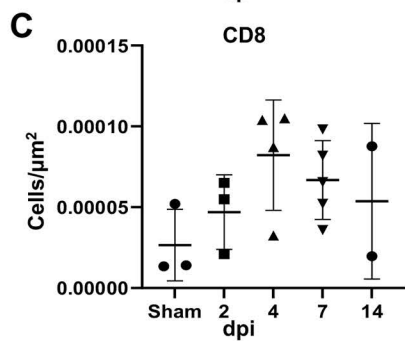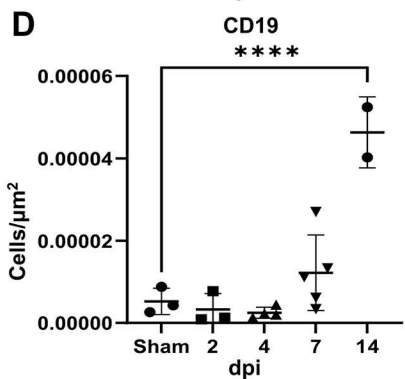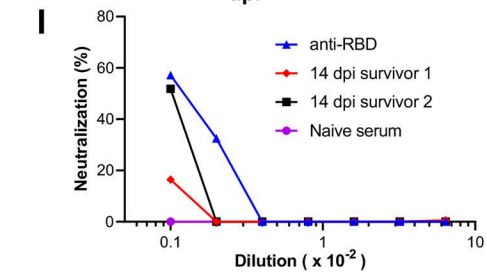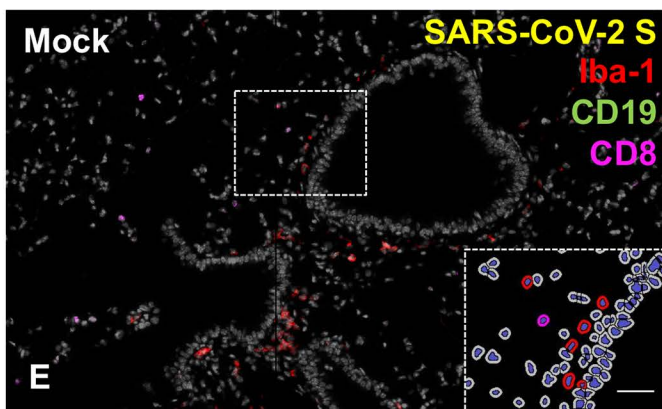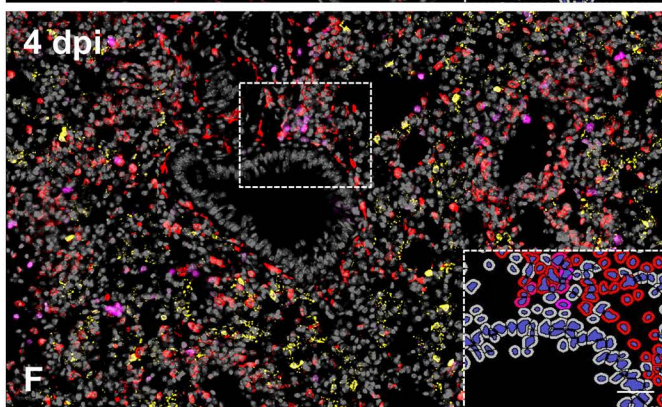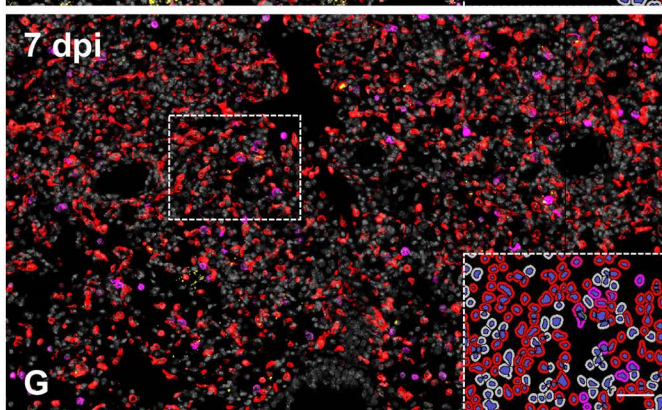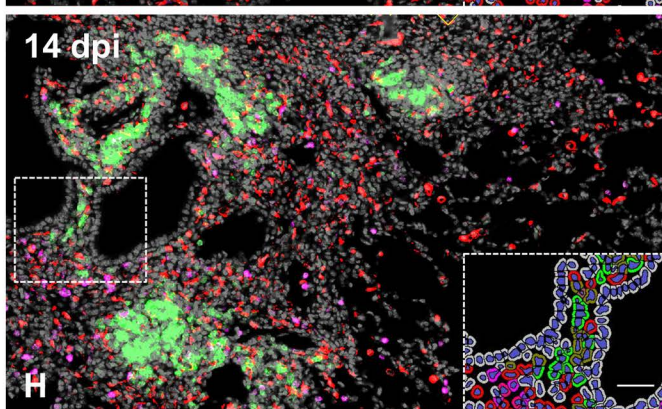



**Figure 7** Cerebrum

**Olfactory bulb**

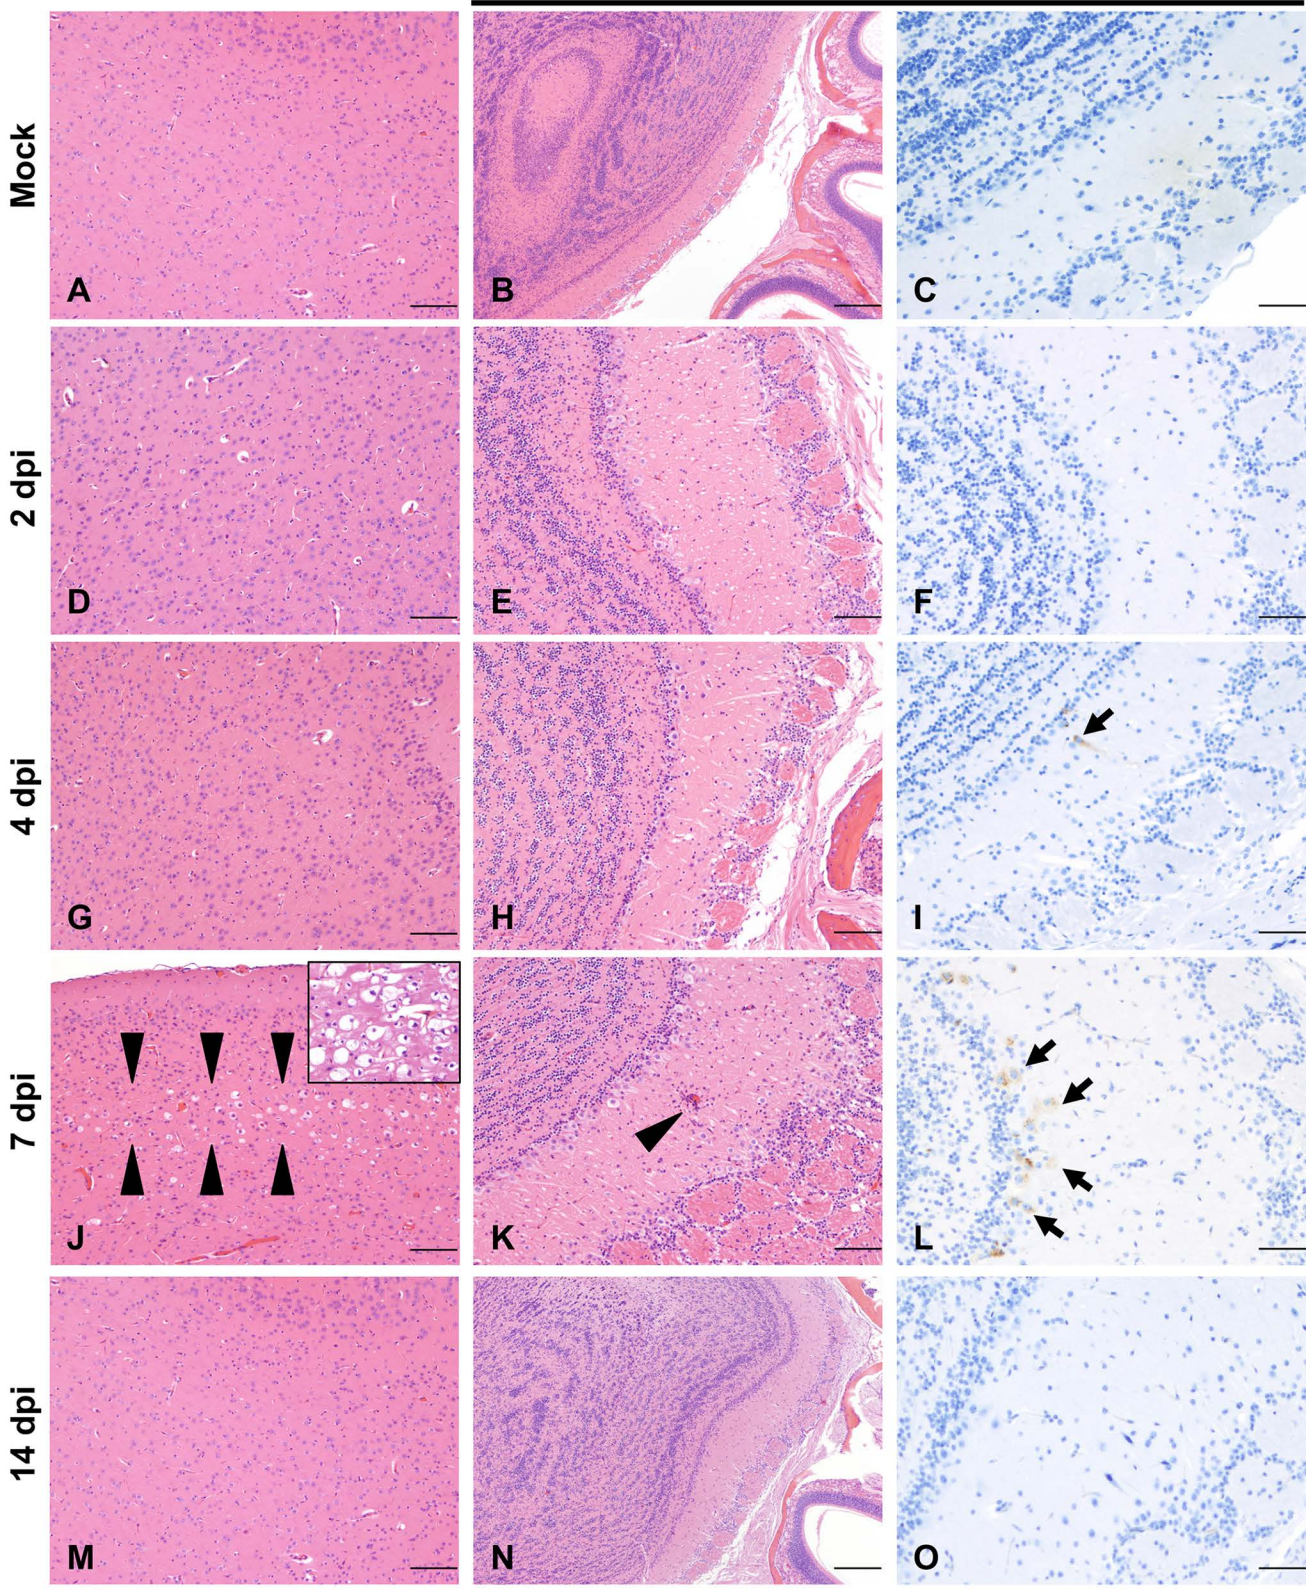



**Figure 8****A**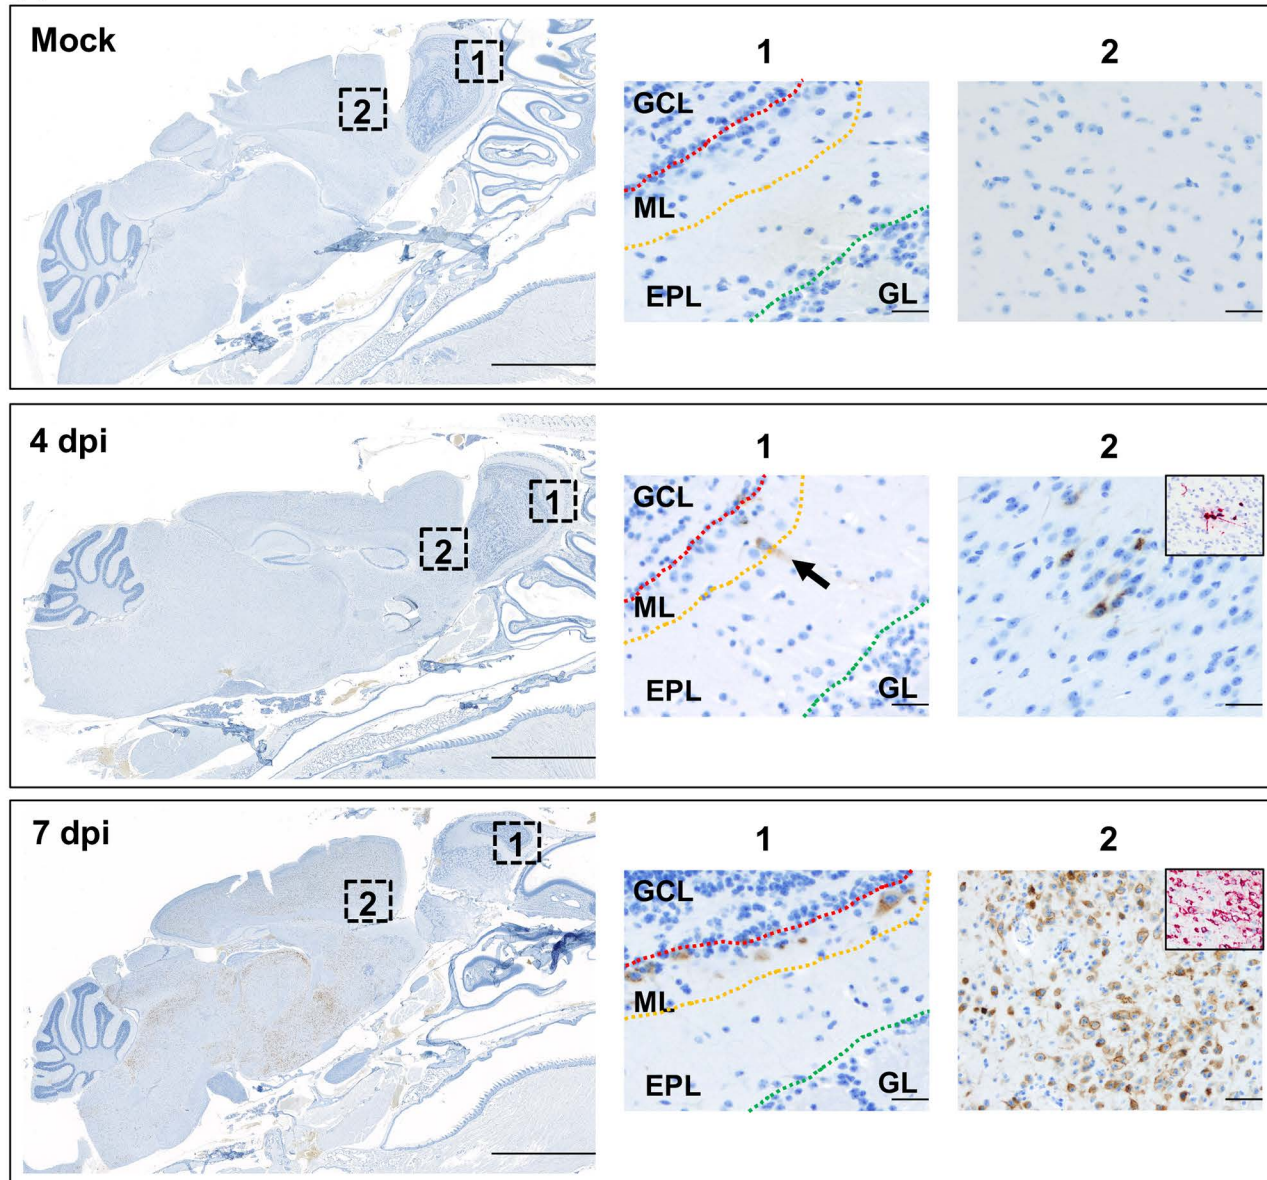**B**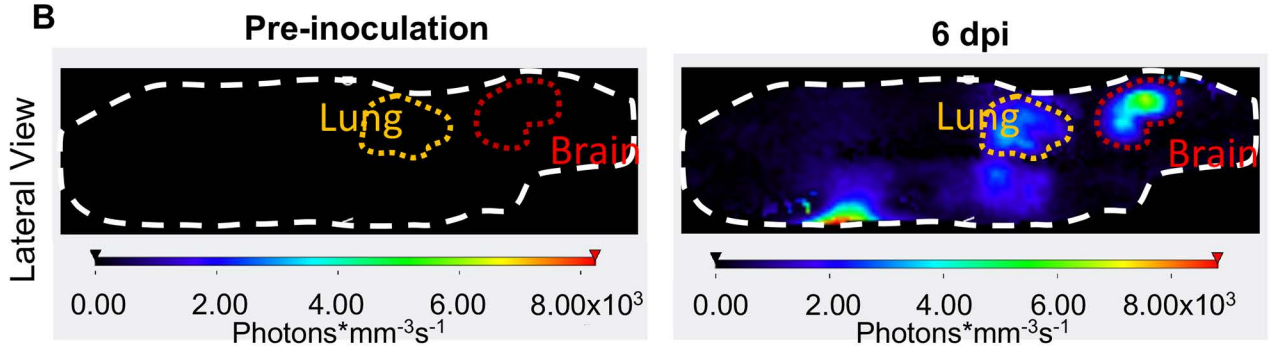



Figure 9

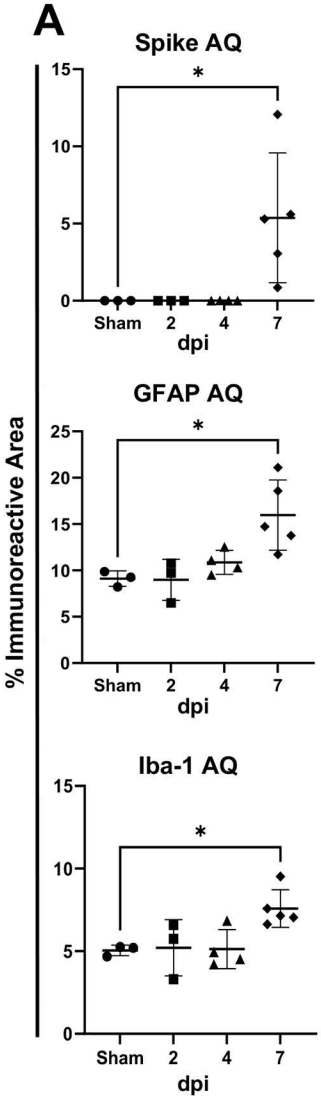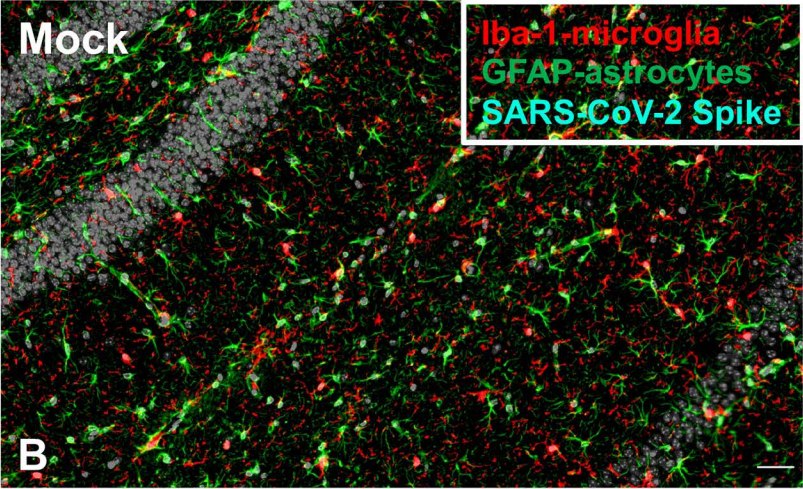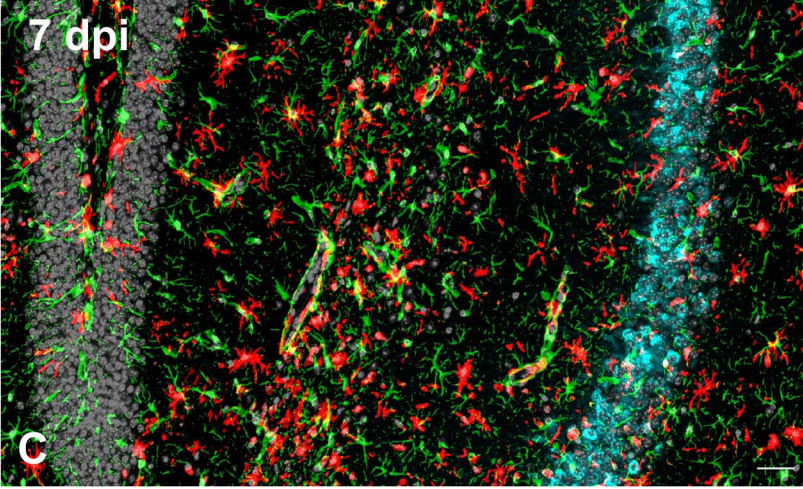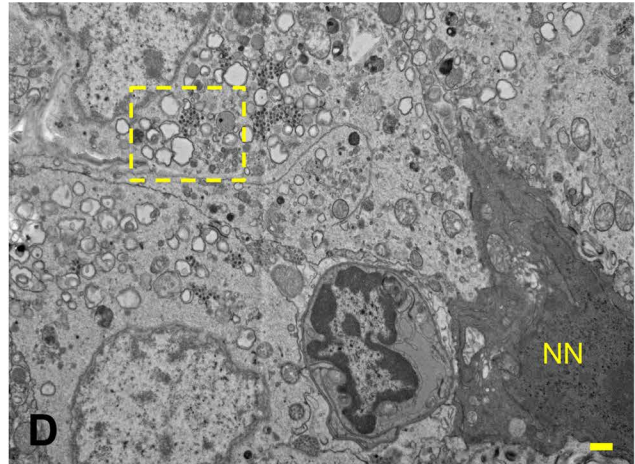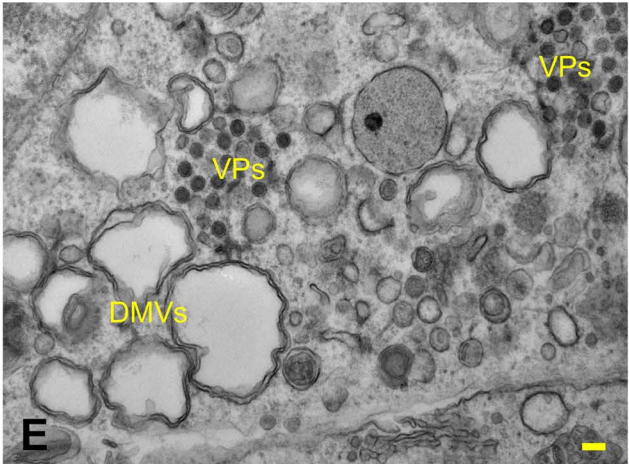



**Figure 10**

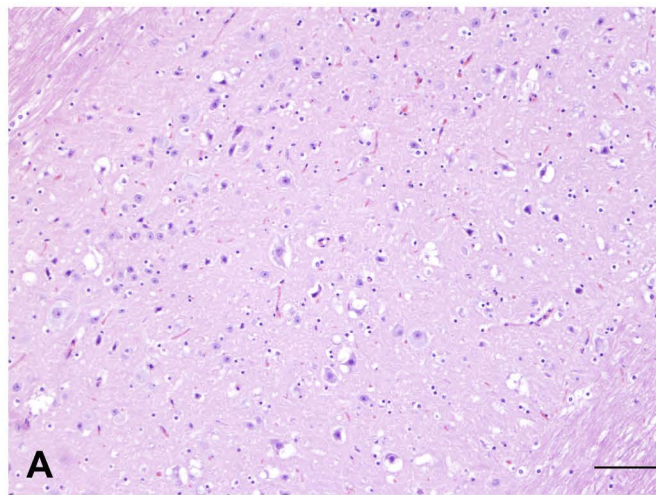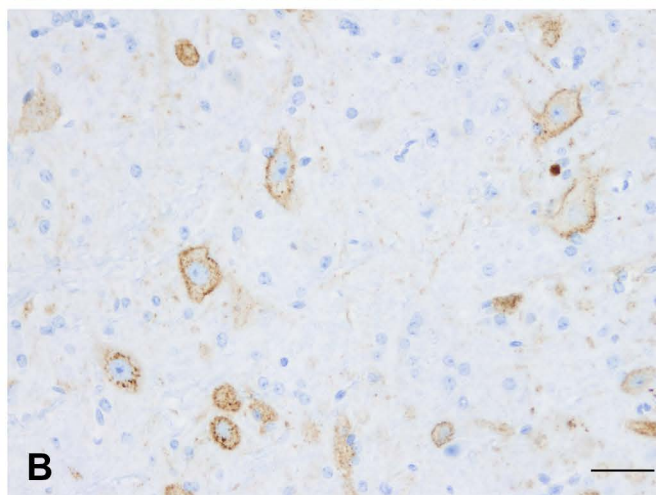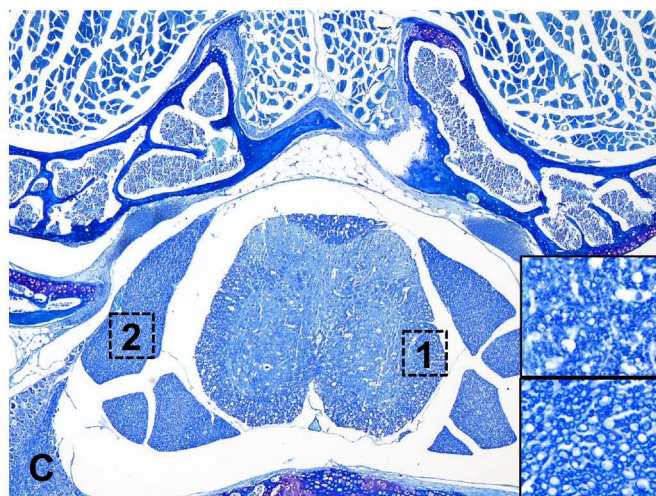



**Figure 11**

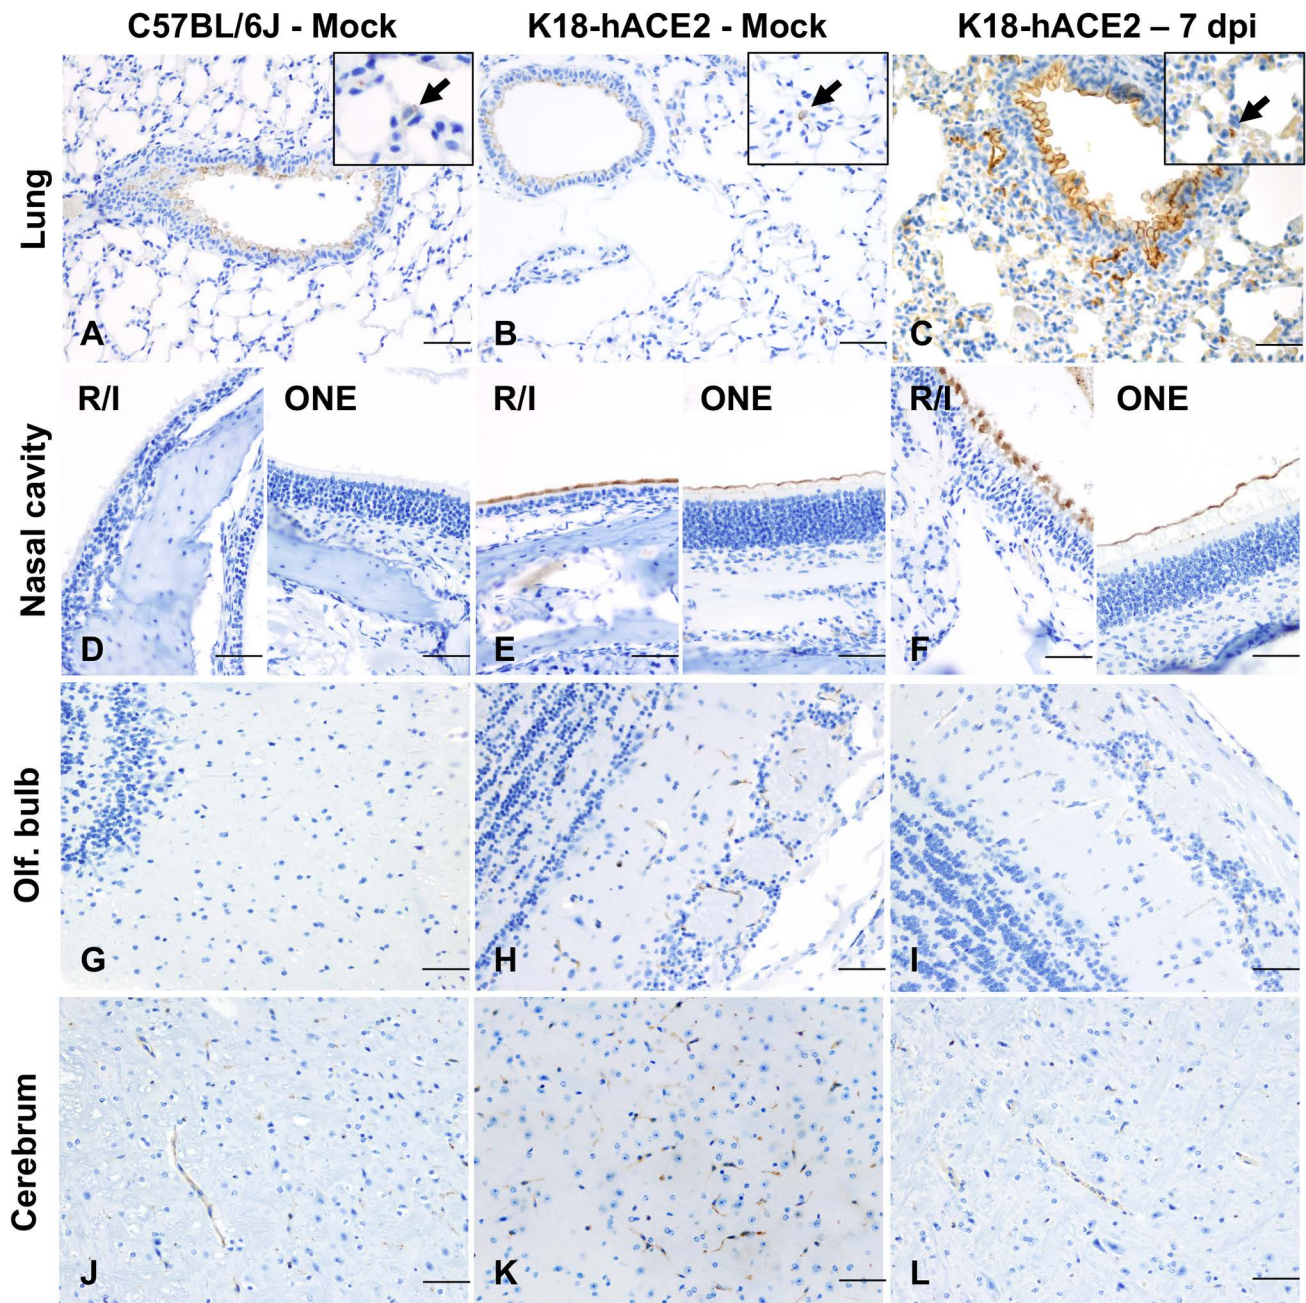

**Figure 12**

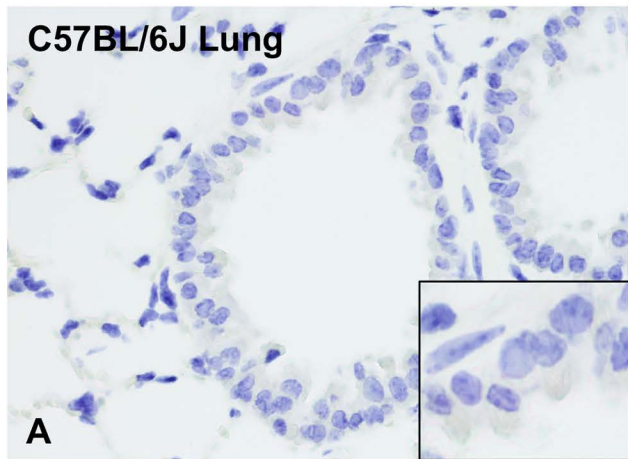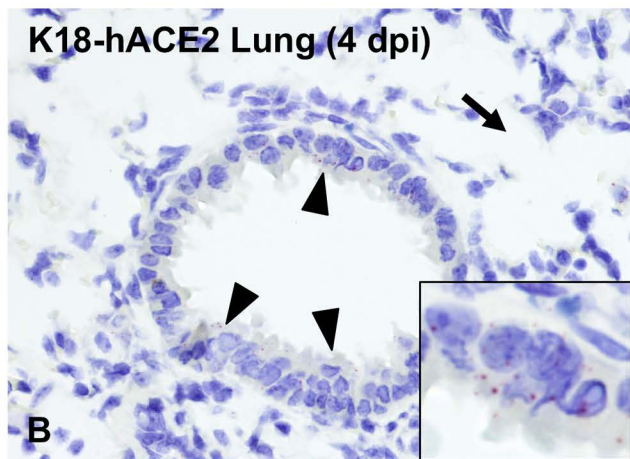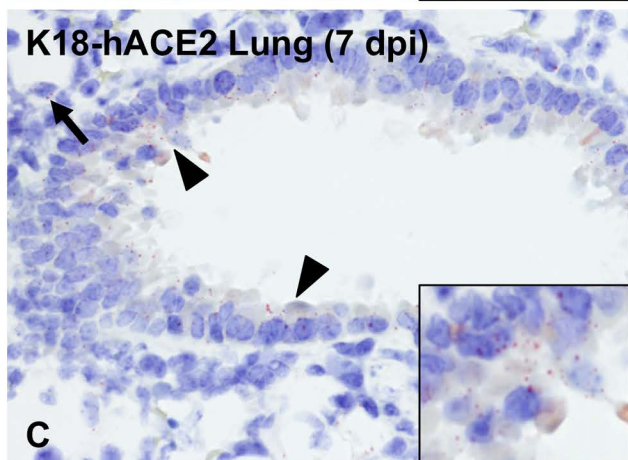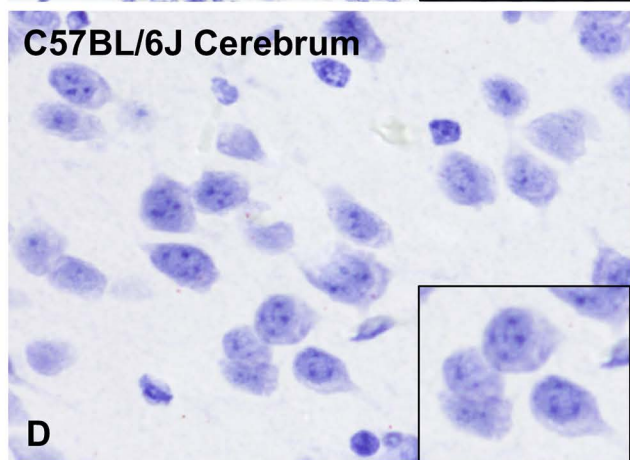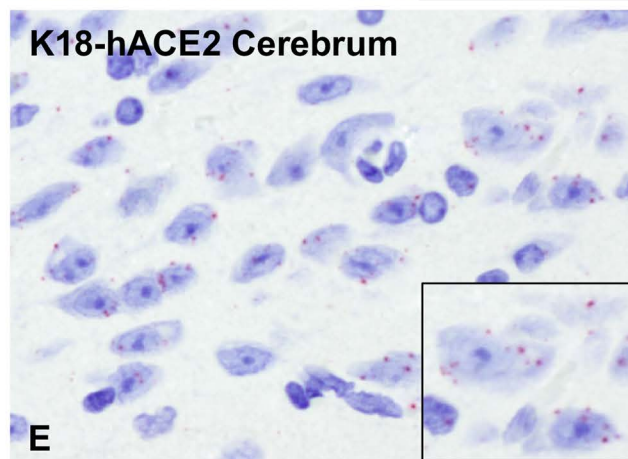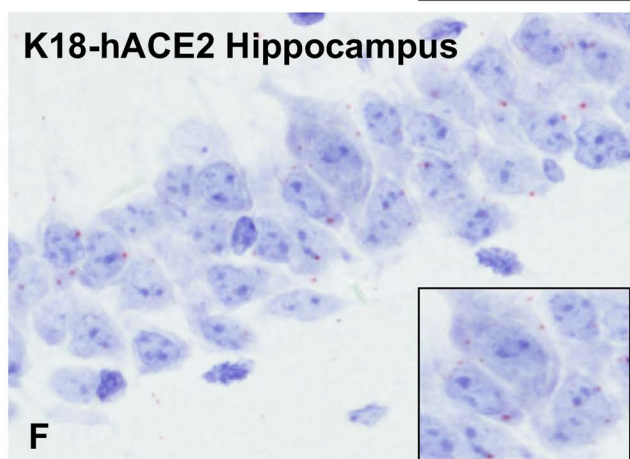



**Figure 13**

**C57BL/6J - Mock**

**K18-hACE2 - Mock**

**K18-hACE2 - 7 dpi**

**Stomach**

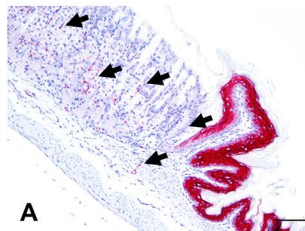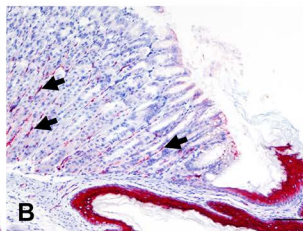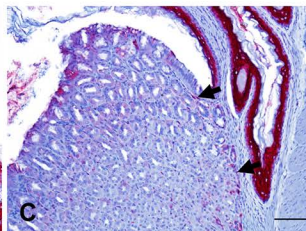

**Small intestine**

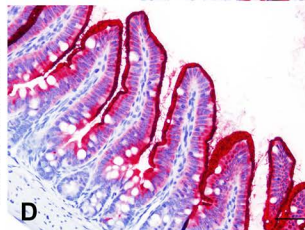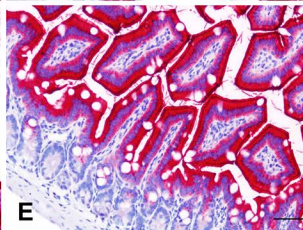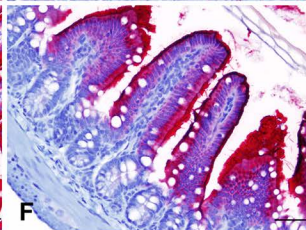

**Colon**

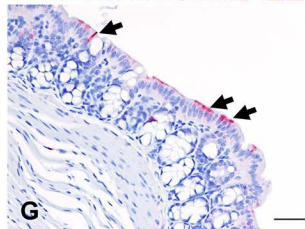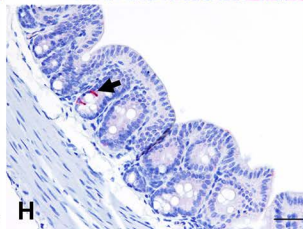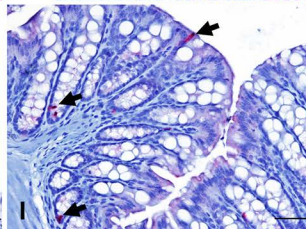

Source: https://www.biorxiv.org/content/biorxiv/early/2021/09/23/2021.01.13.425144.full.pdf
